# Supplementary material for: Topologically associating domains and their long-range contacts are established during early G1 coincident with the establishment of the replication-timing program
Source: PubMed Central journal article supplement — Genome Res. 2015 Aug;25(8):1104–13. doi: 10.1101/gr.183699.114 (PMC4509995; doi:10.1101/gr.183699.114), 2015-08
Supplement: supp_gr.183699.114_Supplemental_Figures.pdf [file supp_gr.183699.114_Supplemental_Figures.pdf]

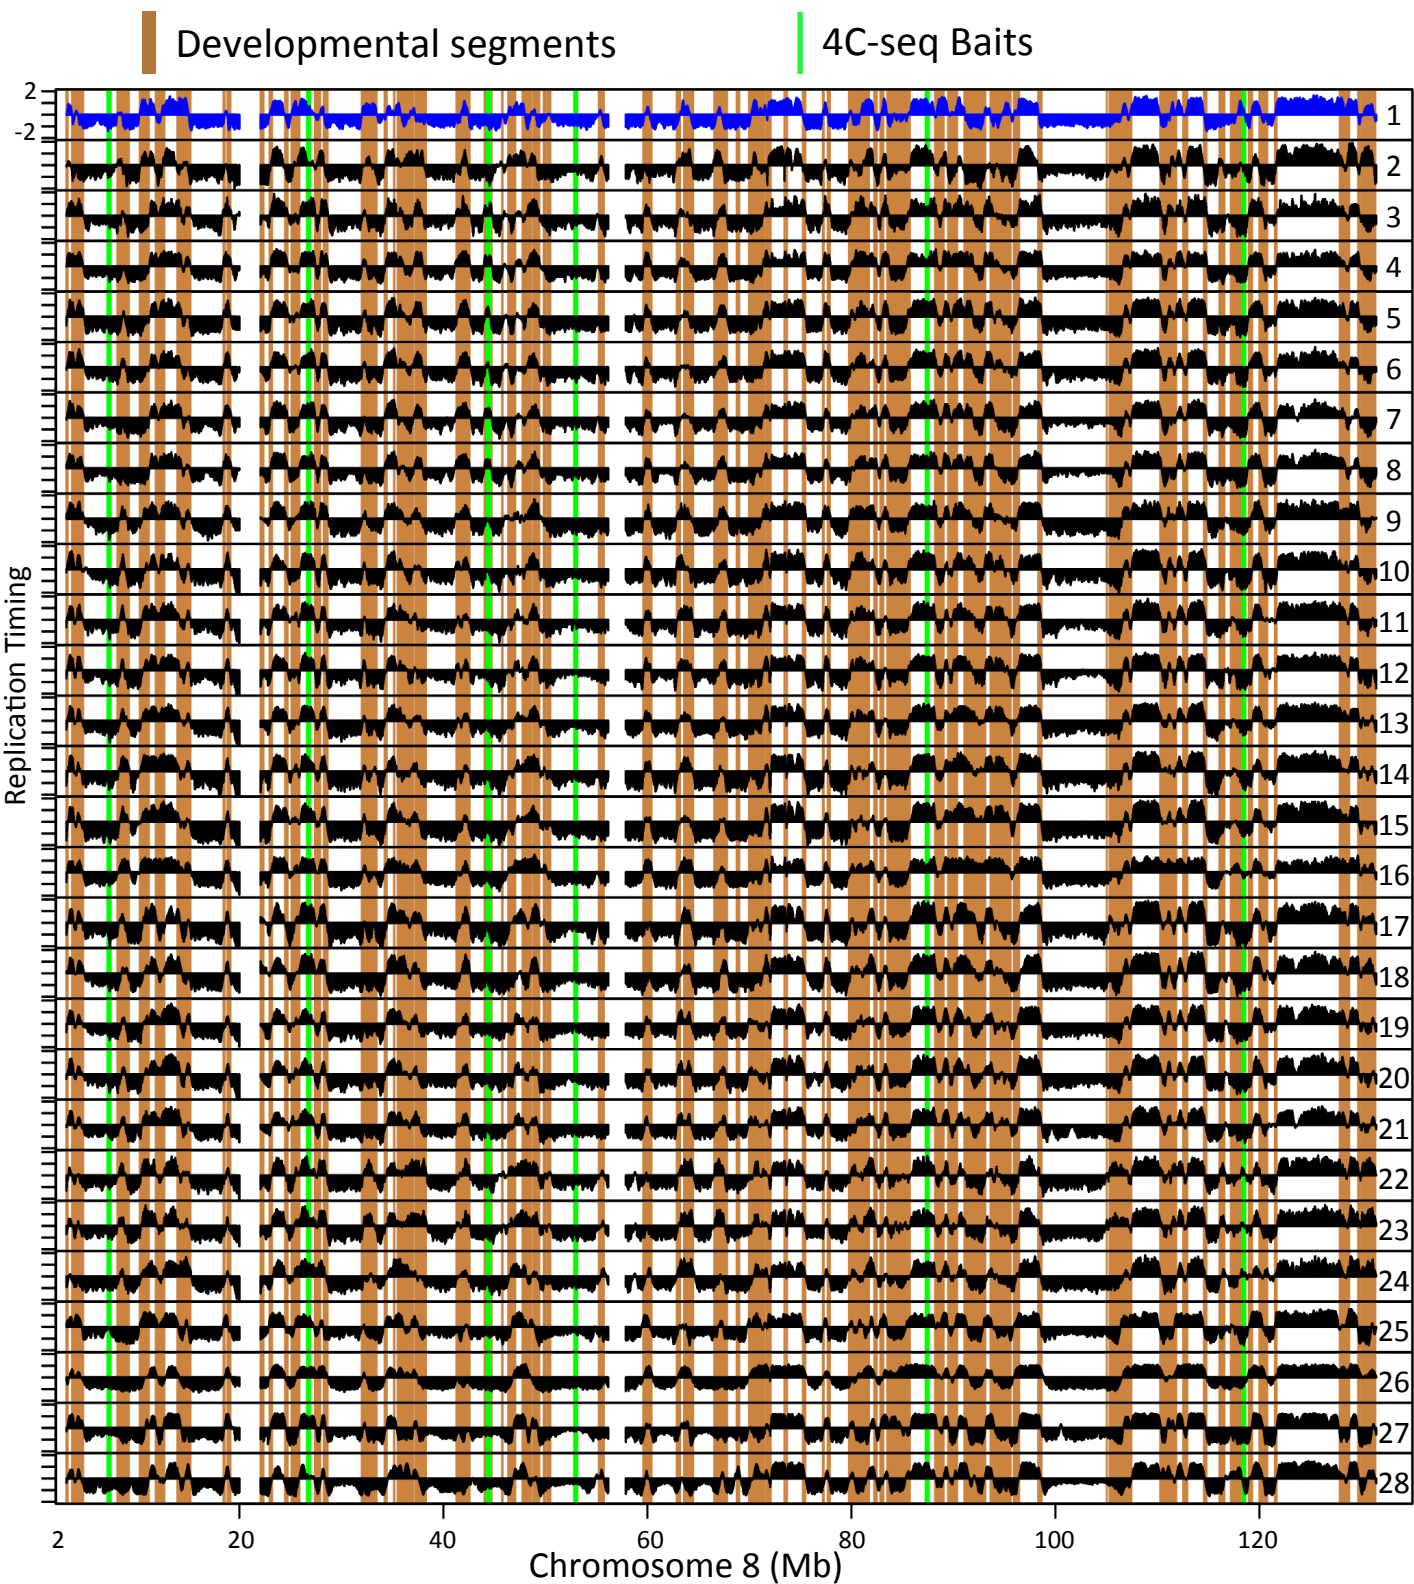

**Supplementary Figure 1: Choosing baits from constitutive and developmental regions.** Windowed replication timing profiles (40 kb) of 28 different mouse cell lines (replicationdomain.org) were compared to classify the genome into constitutive or developmental segments. Plot of Chr 8 is shown here with developmental regions shaded brown. Green lines indicate positions of baits. C127 replication timing profile is shown in blue.

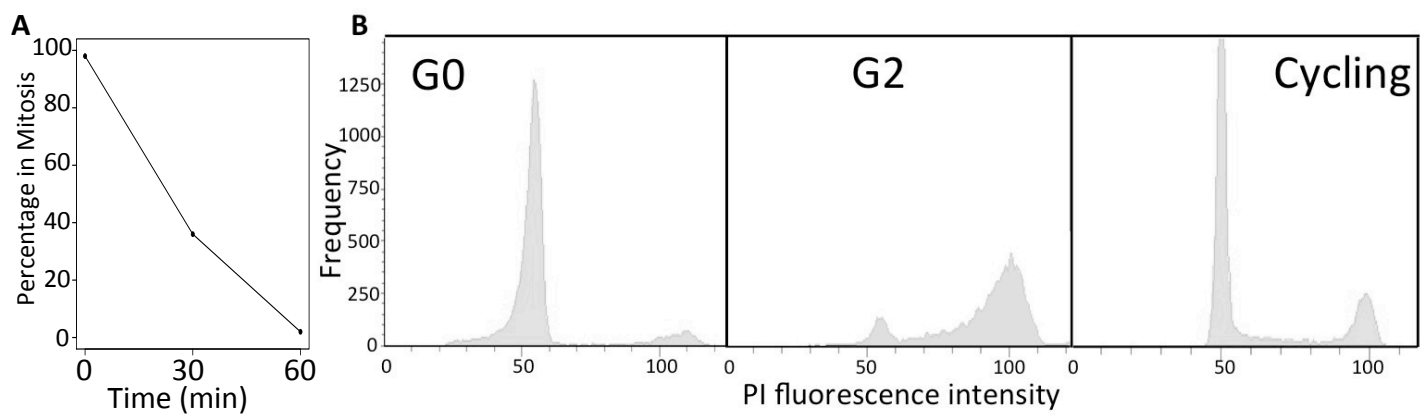

**Supplementary Figure 2: Cell cycle synchronization**

**A)** Plot showing percentage mitotic cells vs time after release from nocodazole block. **B)** FACS profiles showing synchrony at G2 and G0 compared to cycling C127 cells.

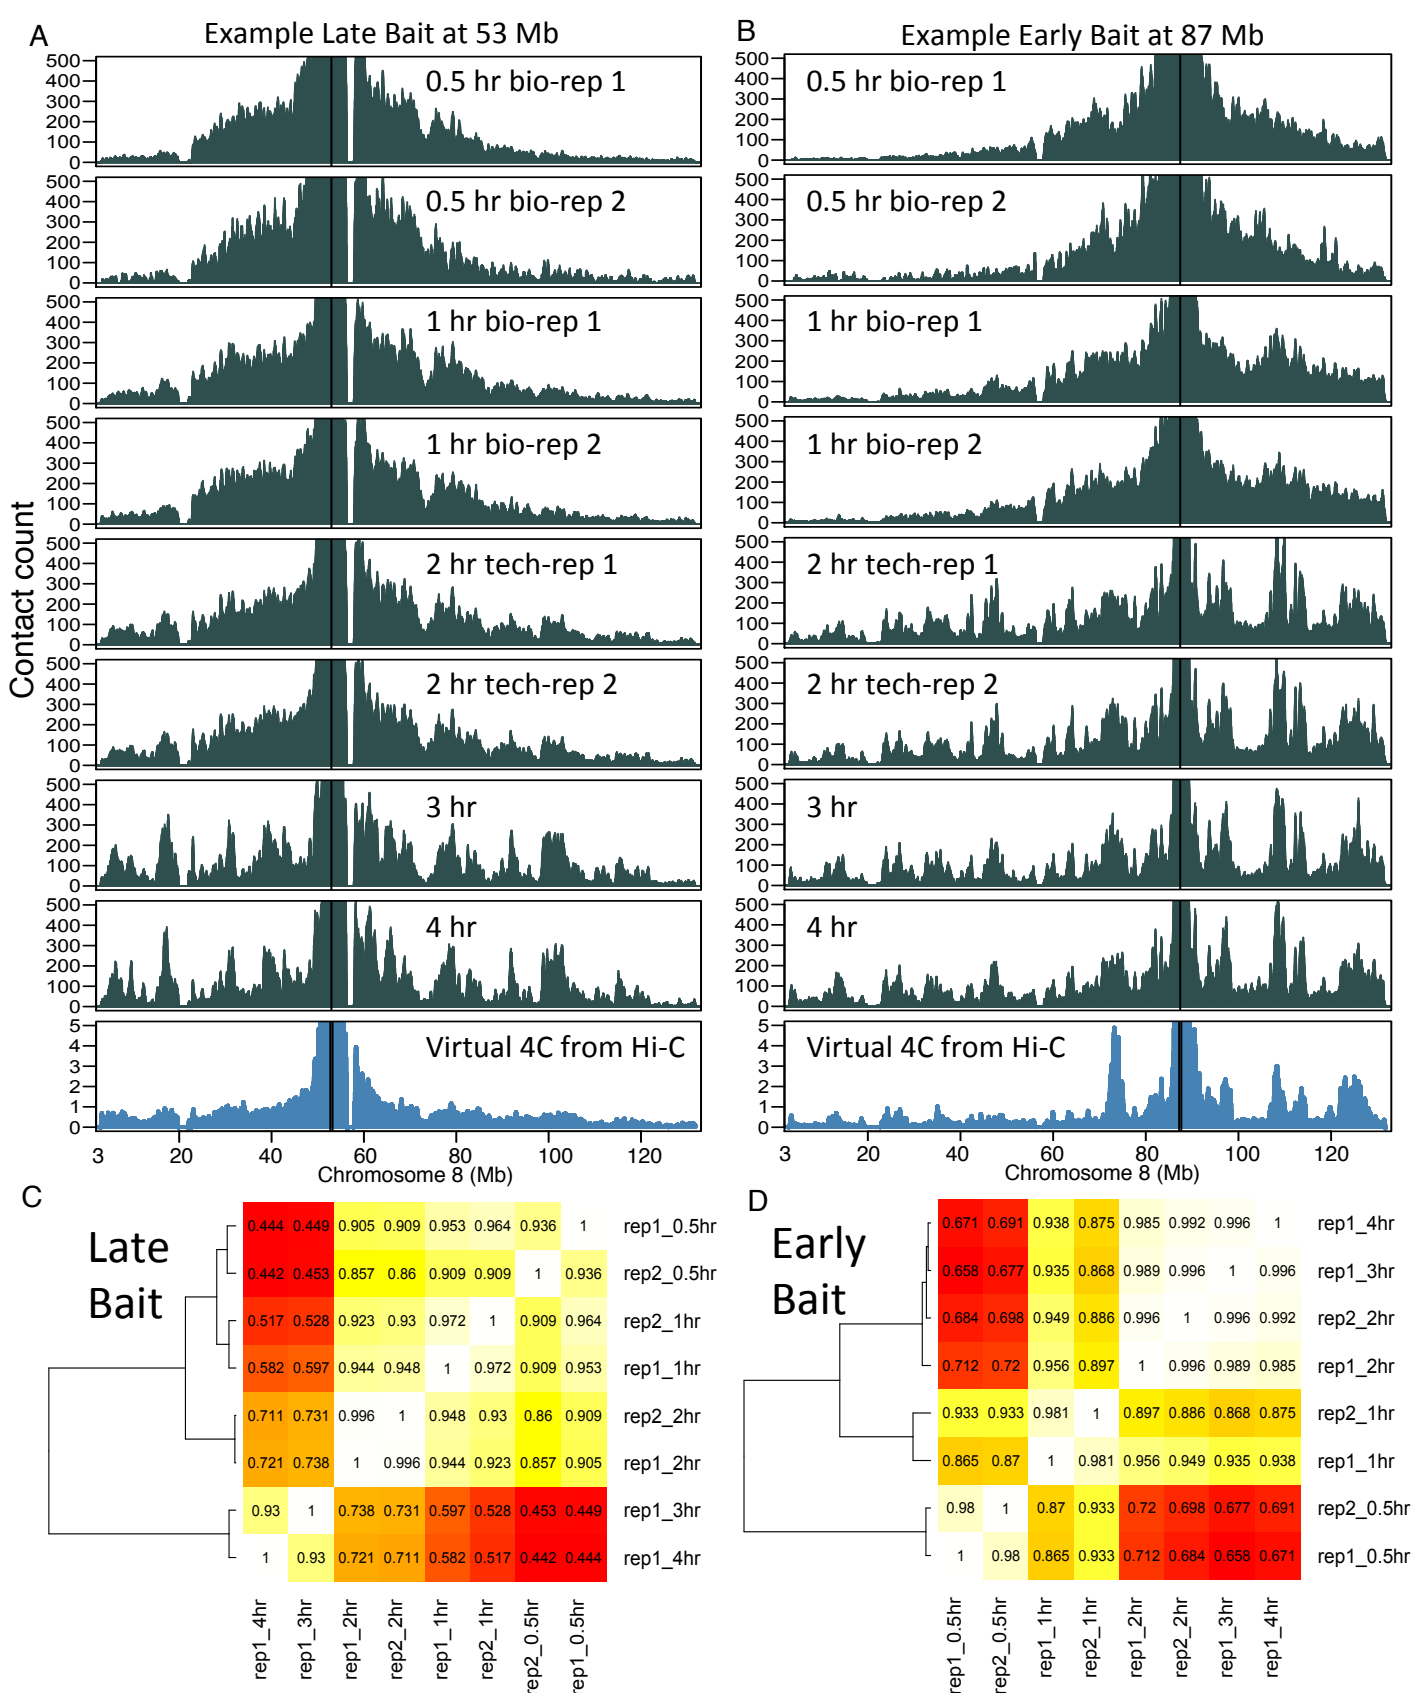

**Supplementary Figure 3: Reproducibility of 4C-seq profiles.**

**A, B**) Comparison between replicates, adjacent time-points and virtual 4C generated from mouse ESC Hi-C data for a late replicating (left) and early replicating (right) region. Biological replicates at 0.5, 1 hr and technical replicate at 2 hr are highly reproducible. 4C-seq profiles between 3 hr and 4 hr also show almost identical profiles indicating the reproducibility of our 4C-seq. Bottom panels (blue plots) show virtual 4C derived from Hi-C from mouse ESCs also shows high similarity to our 4C profile for C127, except that existing Hi-C datasets have lower sequencing depth compared to 4C for a given locus. **C, D**) Heat-map and clustering based on Pearson correlation values of plots shown in A and B. 4C datasets cluster according to replicates and time points for both the early and late example shown here.

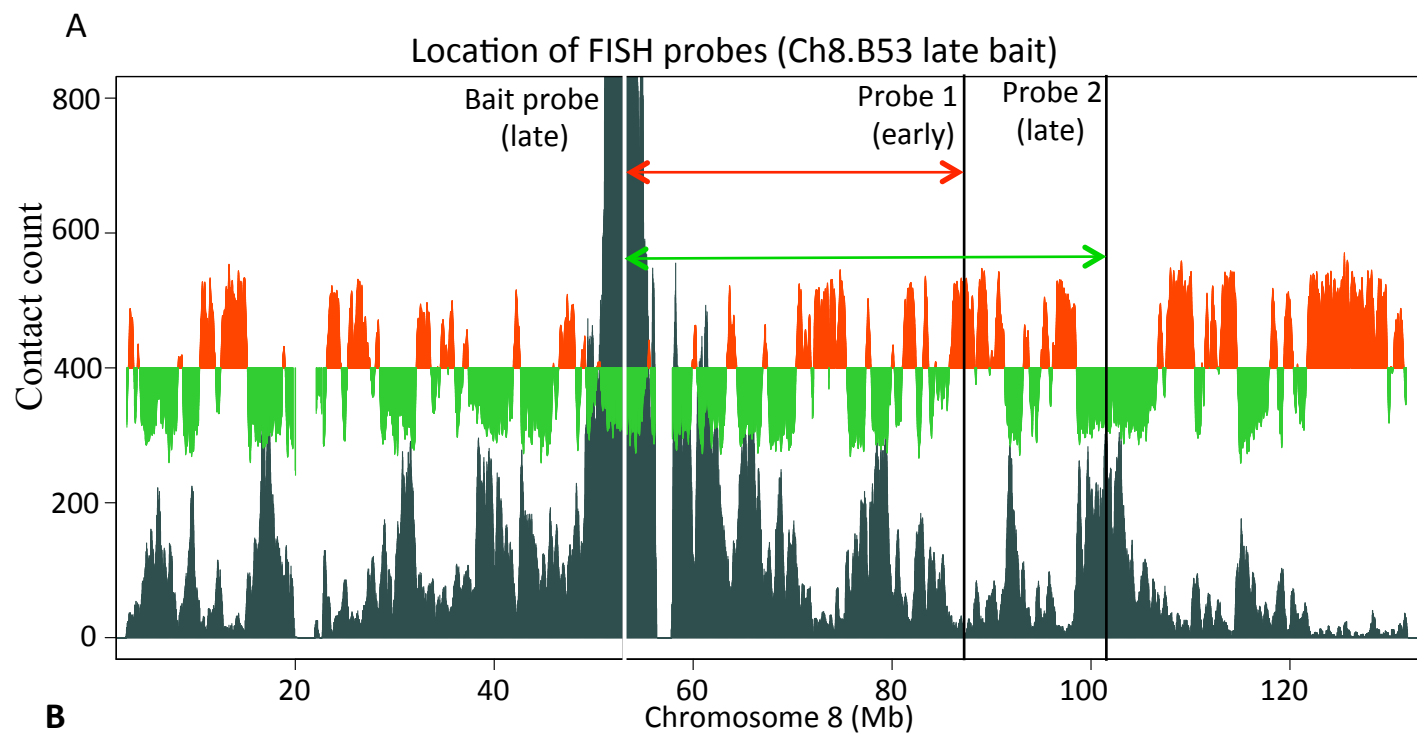

**B**

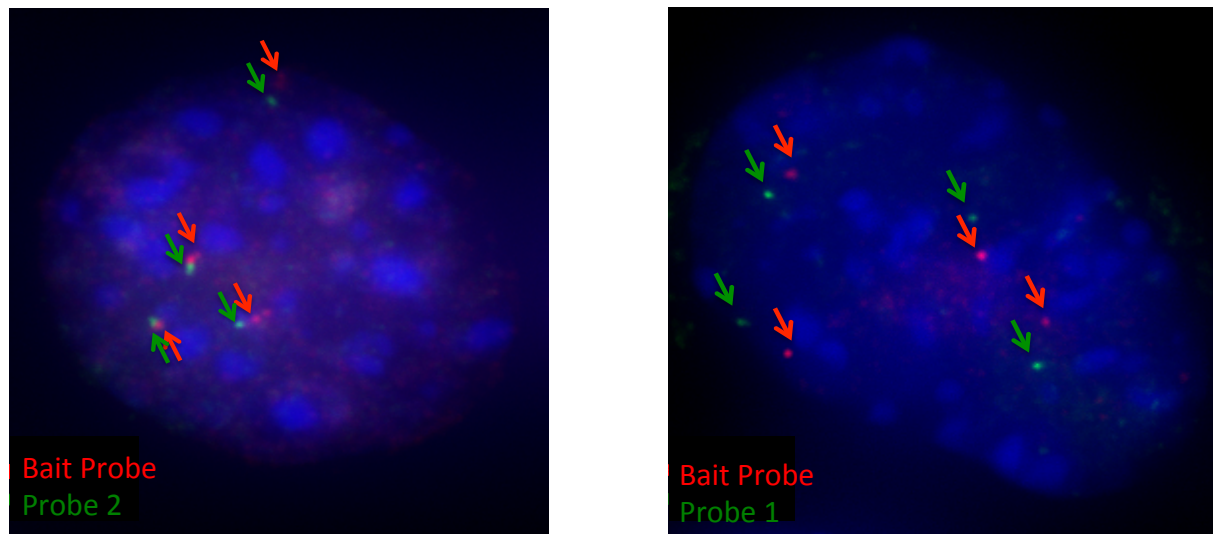

### Supplementary Figure 4: 3D FISH validation of 4C-seq

**A)** Location of FISH probes at a region with low 4C contact count (probe 1) or high 4C contact count (probe 2) on chromosome 8. **B)** Exemplary FISH images, from data shown in Figure 1A showing agreement of 3D distance with 4C data. Even though probe 2 is further away from the bait than probe 1 on the linear chromosome, probe 2 is separated by a lesser distance from the bait in 3D in the nucleus. C127 cells are tetraploid and therefore shows 4 FISH signals.



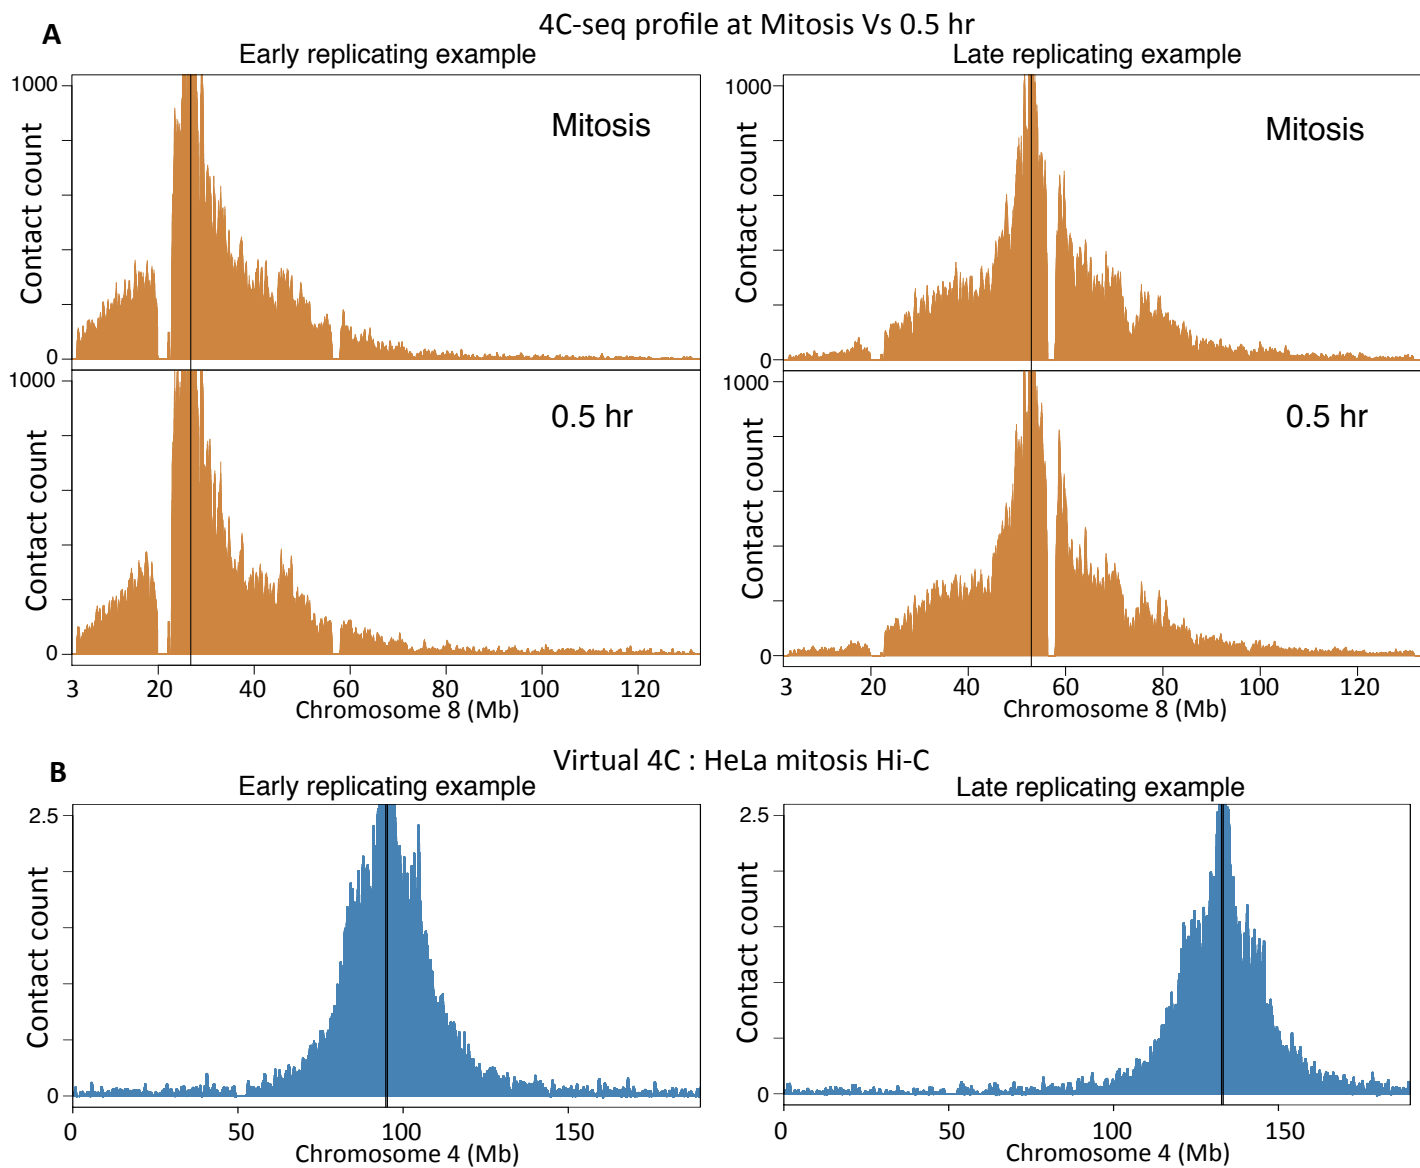

**Supplementary Figure 5: Comparison of 4C-seq at mitosis, 0.5 hr post-mitosis in C127 cells and Hi-C at mitosis in HeLa cells.**

**A)** Comparison of 4C contact counts between mitosis and 0.5 hr post-mitosis for baits in an early replicating region and late replicating region in C127 cells showing lack of compartmentalization. **B)** Virtual 4C for an early and late replicating region generated from Hi-C in HeLa cells synchronized in mitosis showing a similar lack of compartmentalization.

**A**

Ch8.B7 (Constitutive late)

Ch8.B26 (Constitutive early)

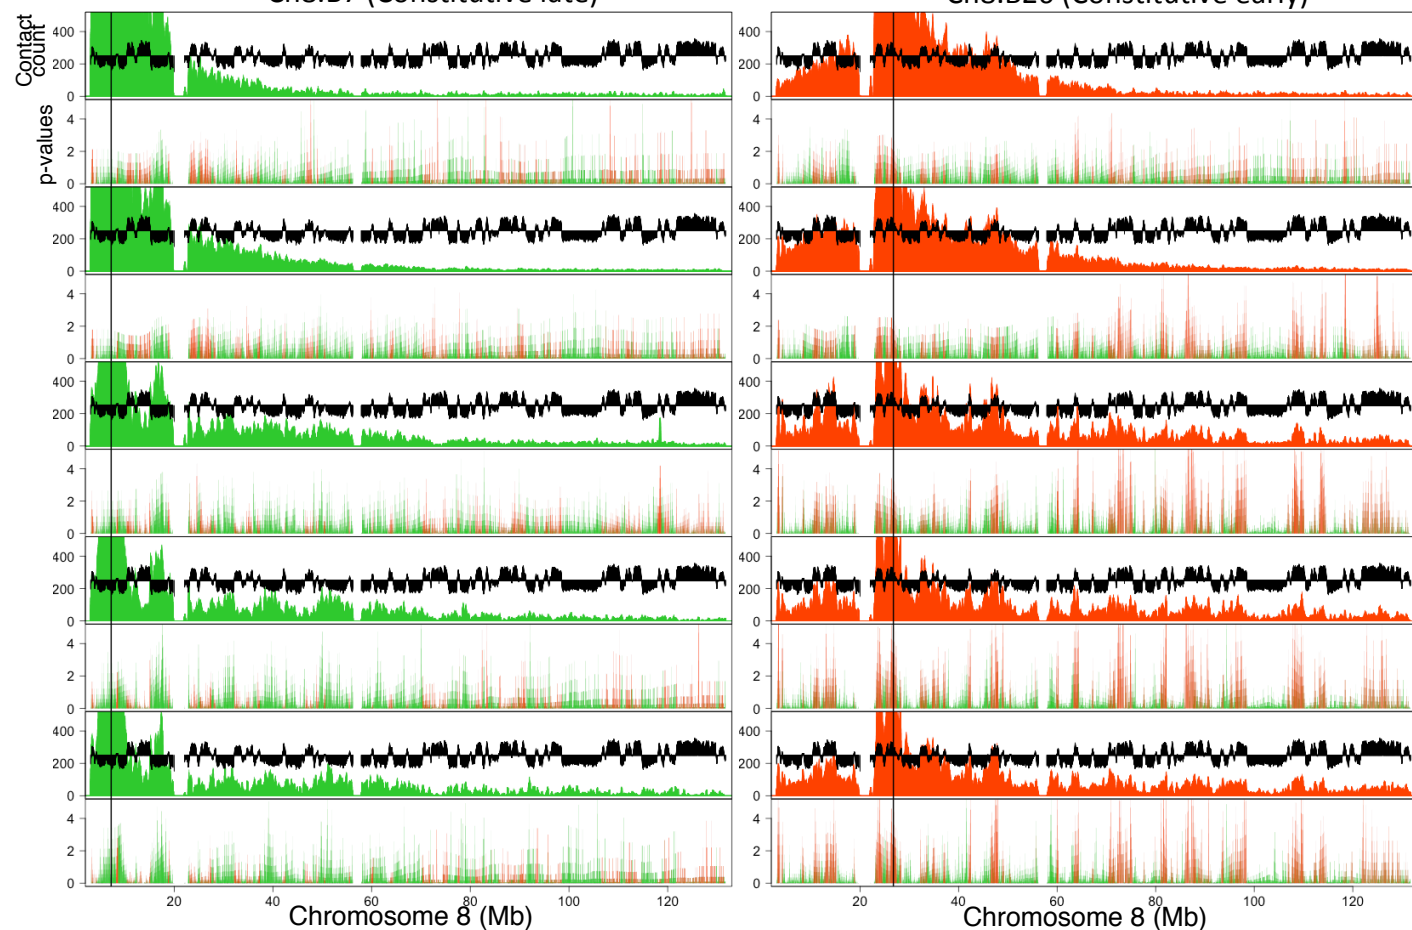

Ch8.B53 (Constitutive late)

Ch8.B87 (Constitutive early)

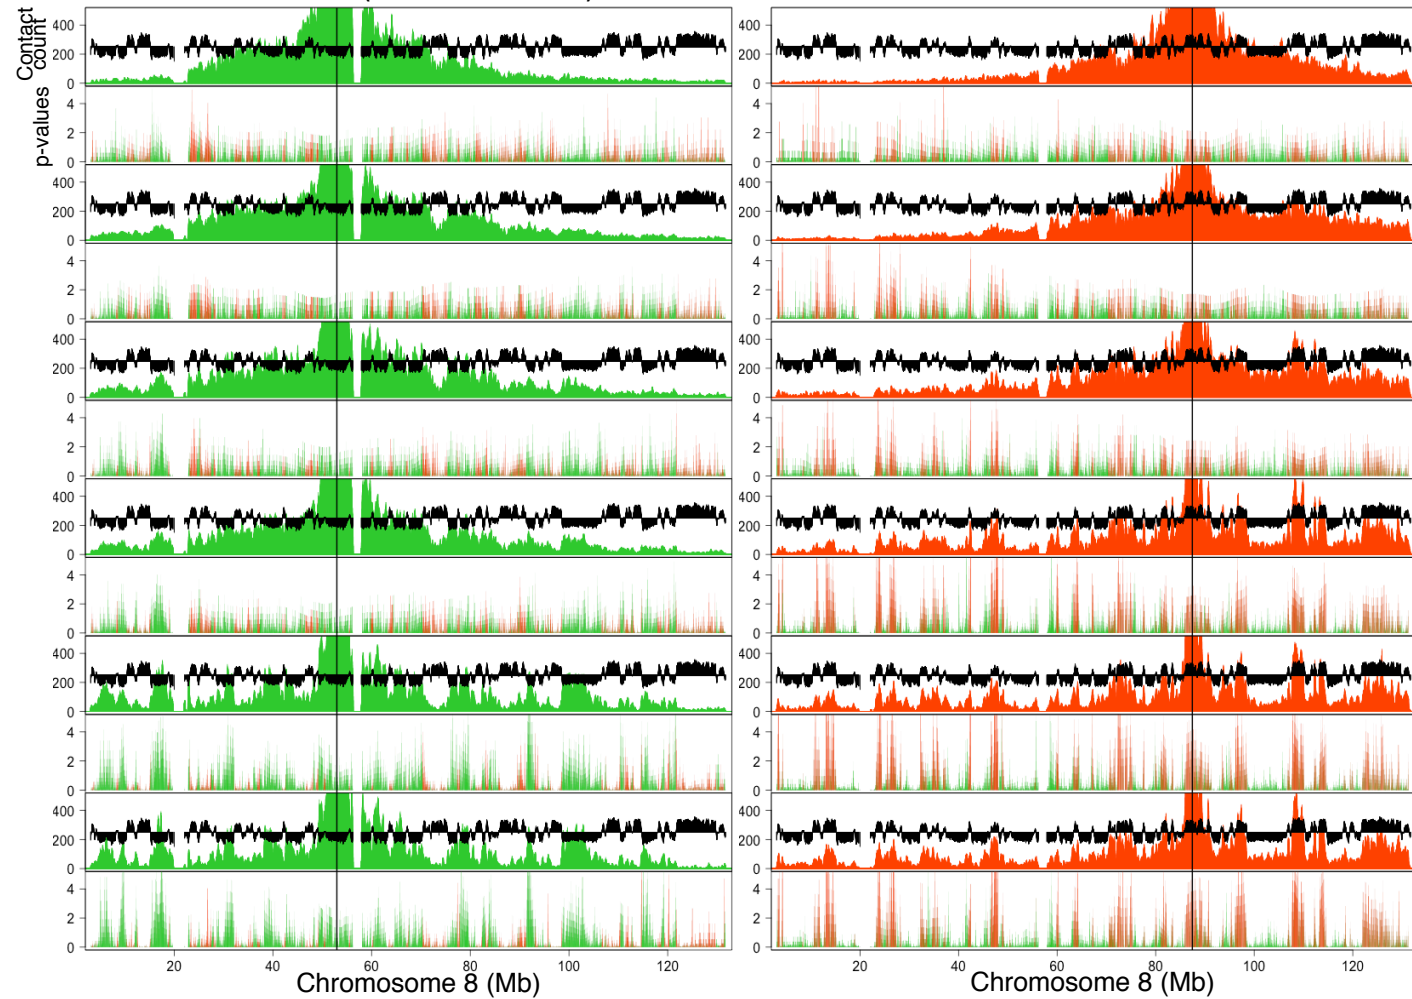

Ch8.B44 (Developmental late)

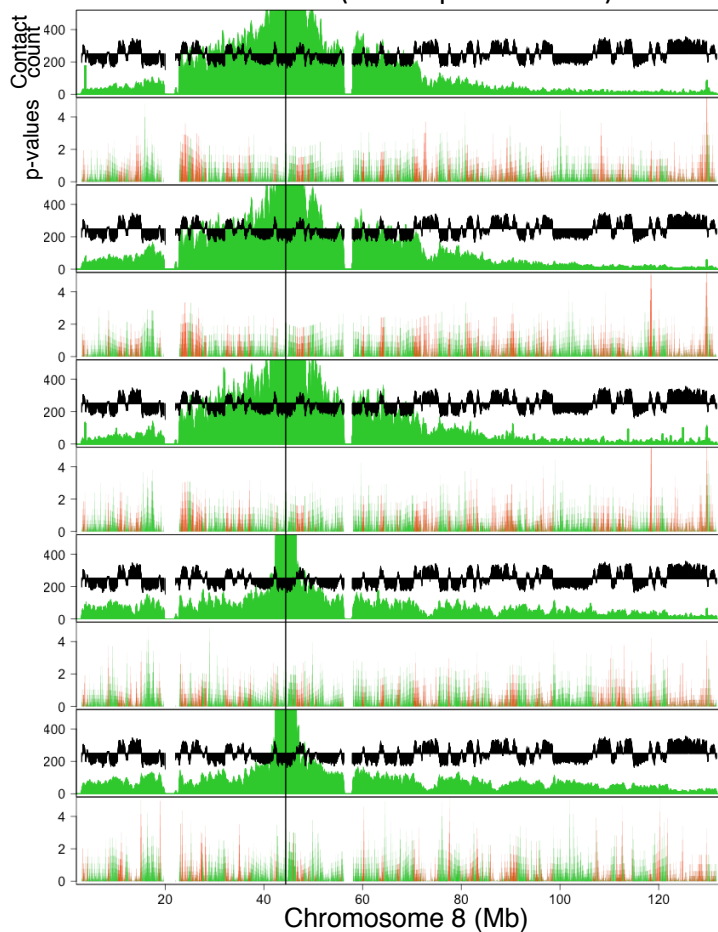

Ch8.B118 (Developmental early)

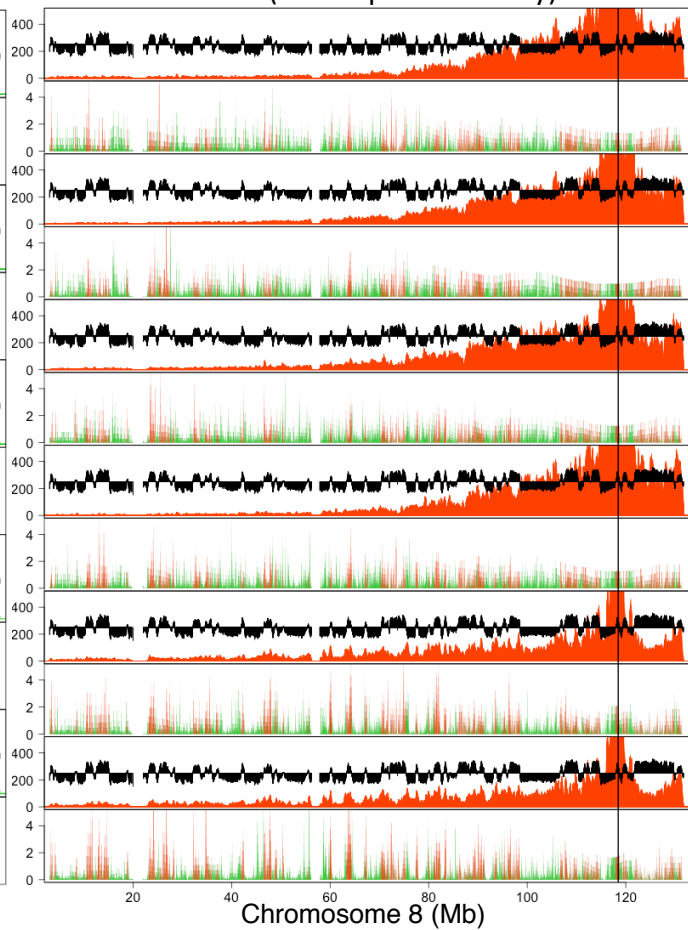

Ch16.B30 (Constitutive early)

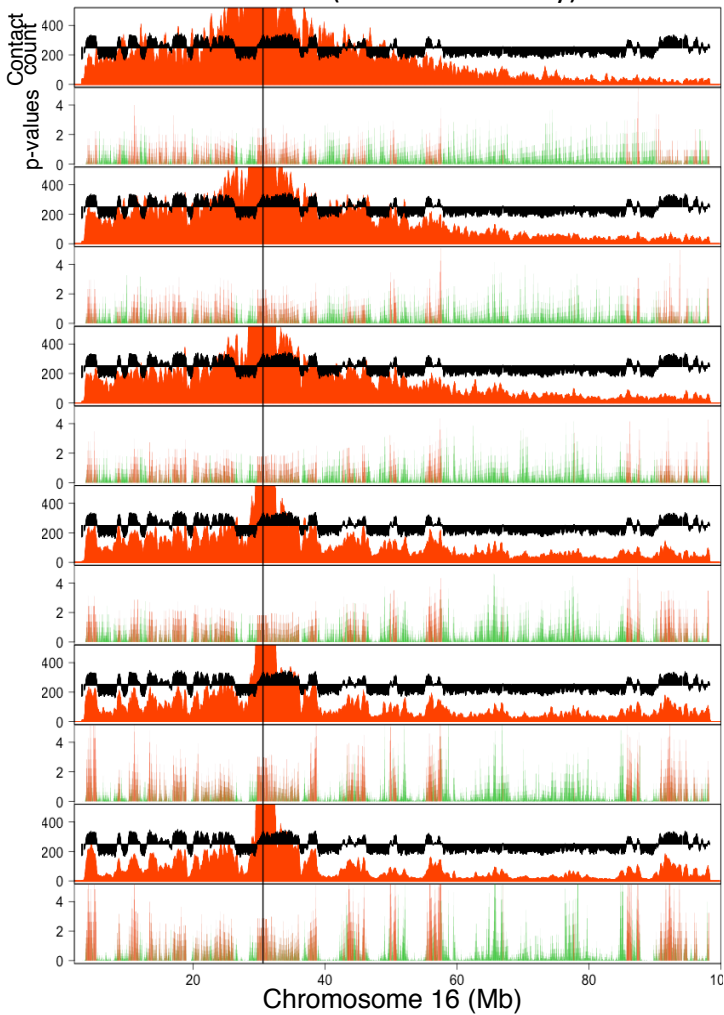

Ch16.B41 (Constitutive late)

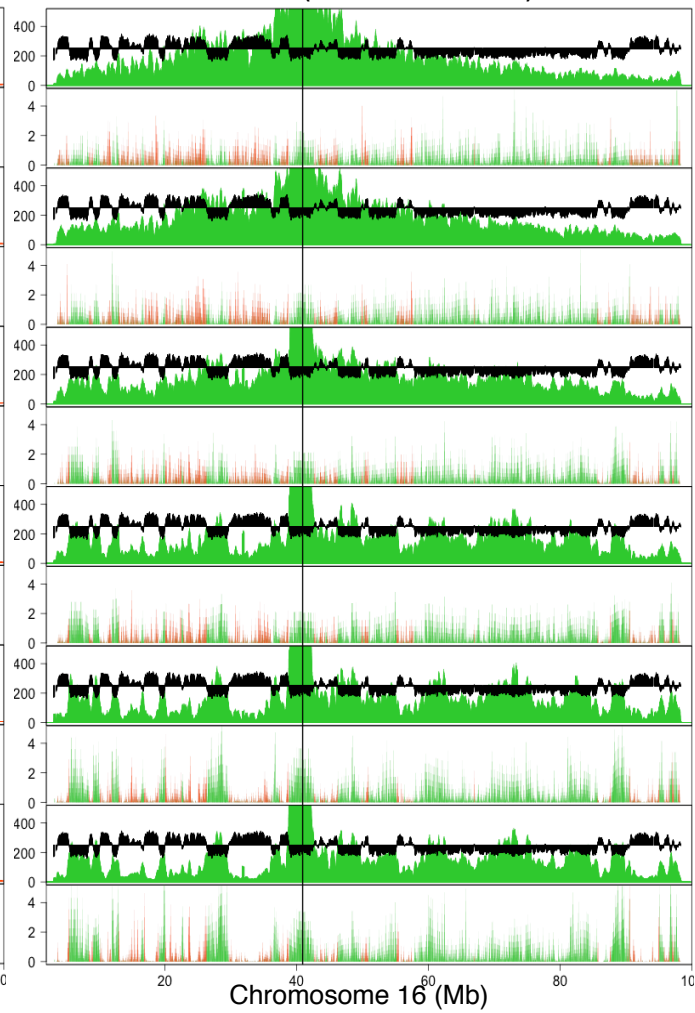

Ch16.B46 (Developmental early)

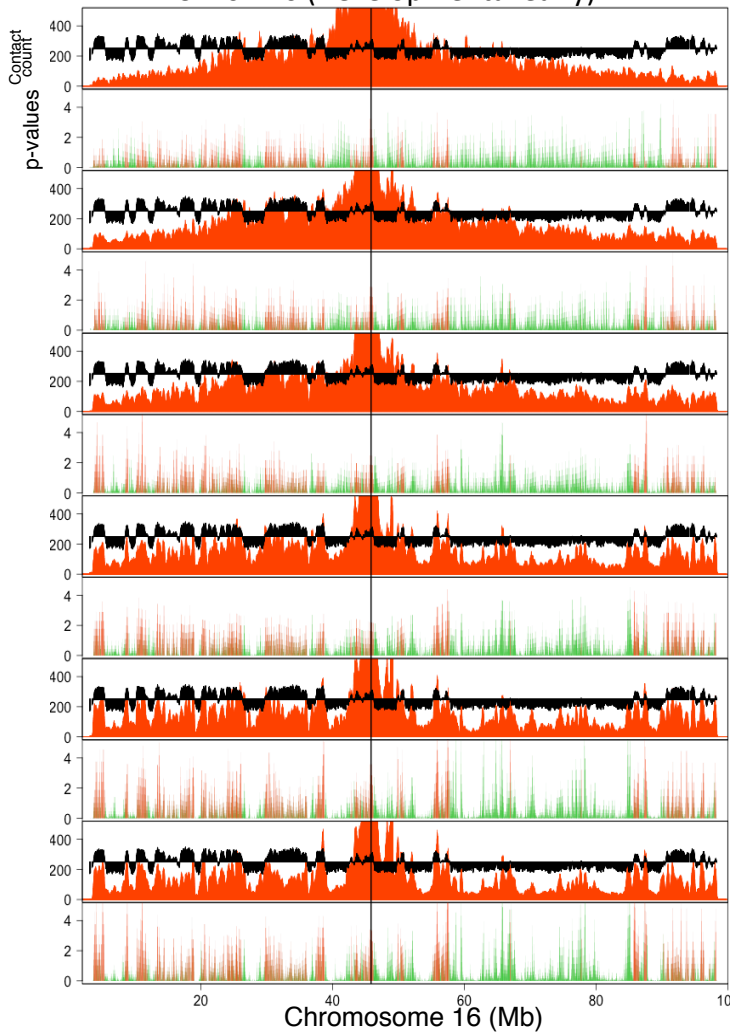

Ch16.B48 (Developmental late)

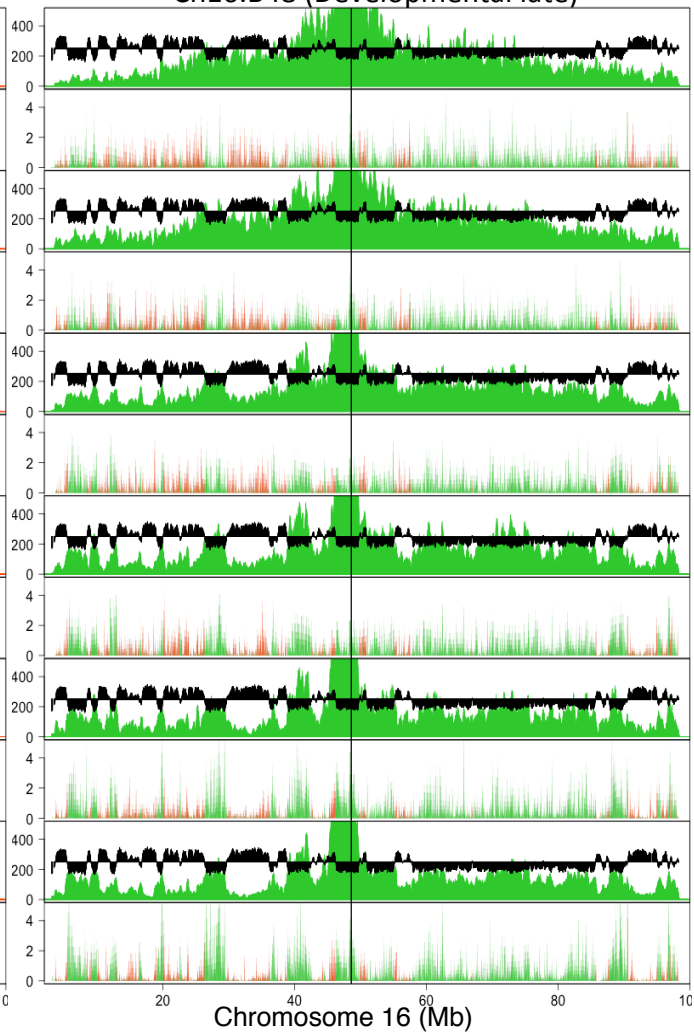

Ch17.B50 (Developmental early)

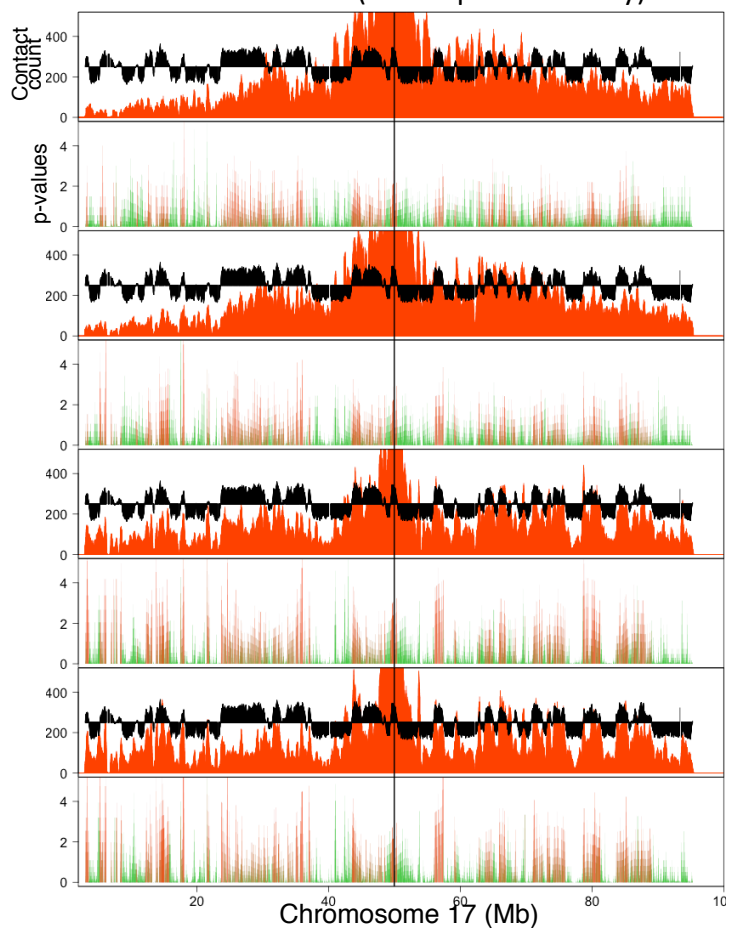

Ch17.B76 (Constitutive late)

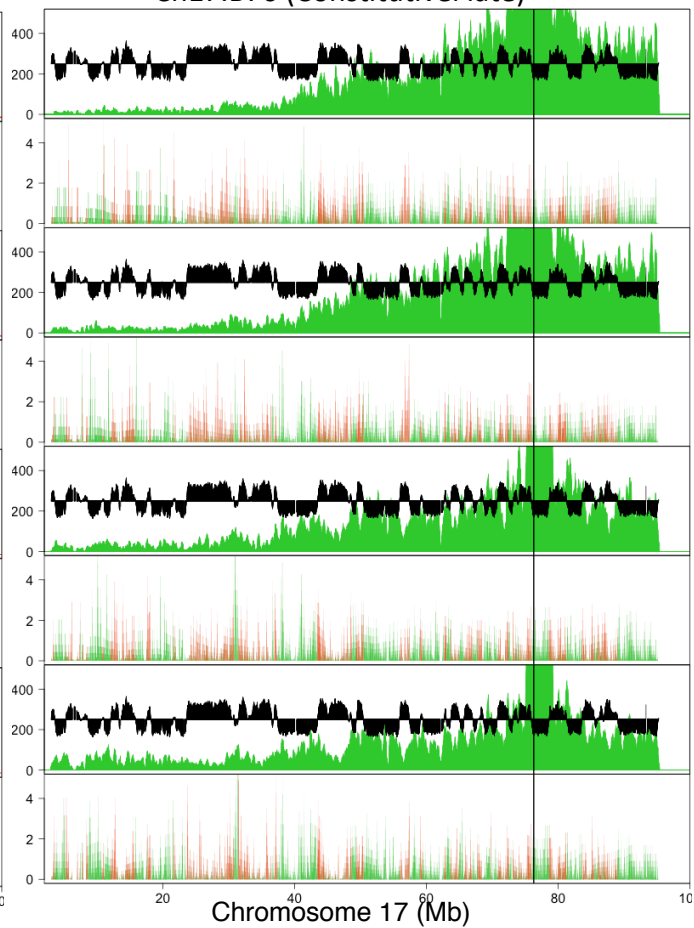

**B**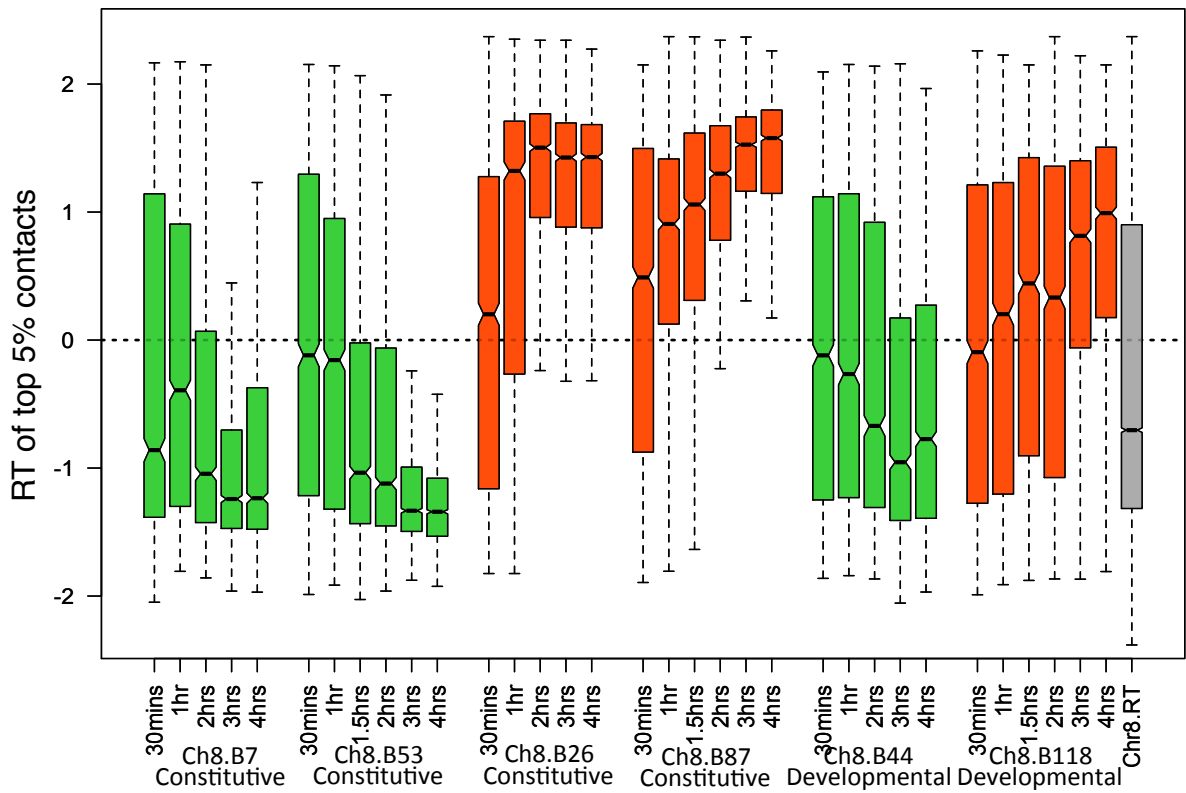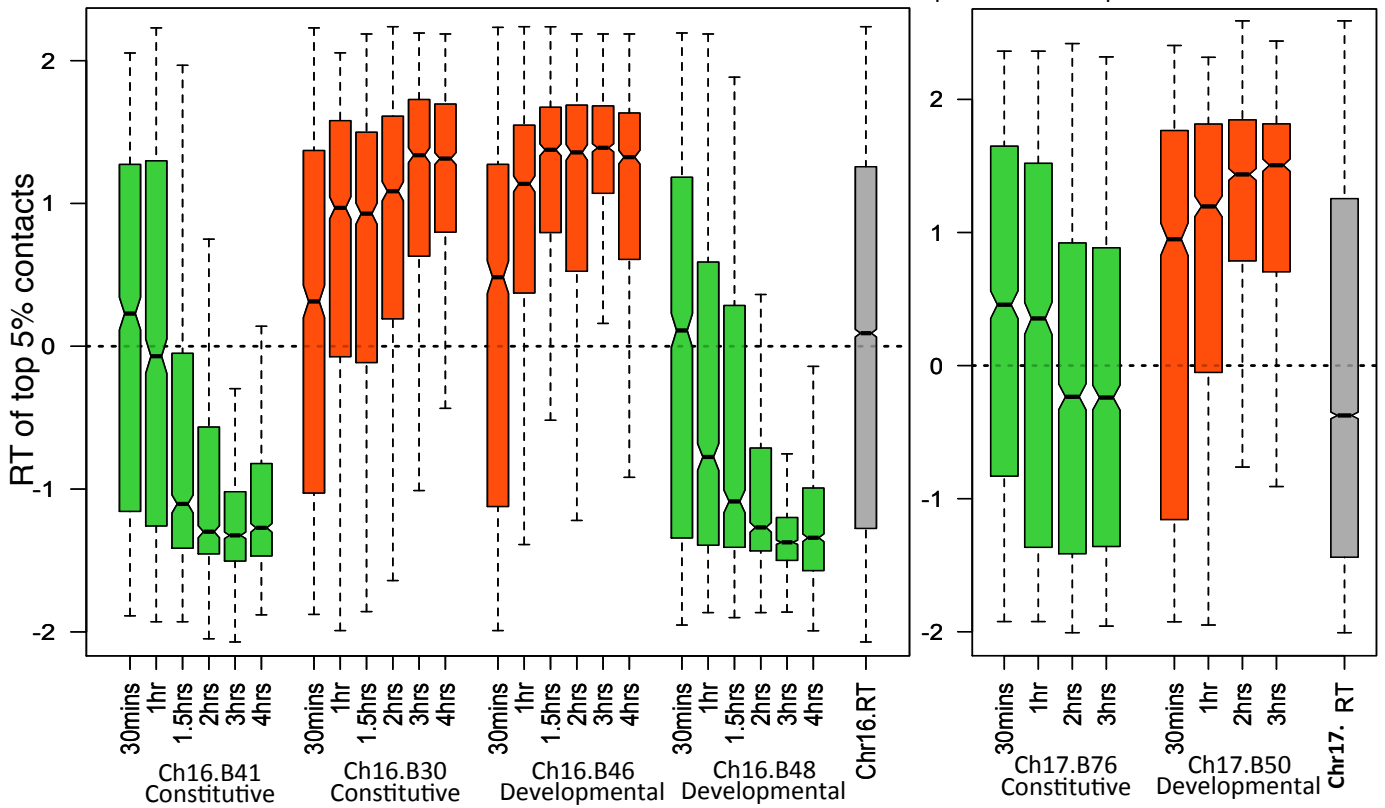

**Supplementary Figure 6: Smoothed contact count and p-values for all 12 baits. A)**

Smoothed contact count and  $-\log_{10}(\text{p-values})$  are shown for all 12 baits across all time-points analyzed. For contact count plots, early and late baits are shown by red and green colors respectively. For p-value plots, red and green indicates interaction with early and late replicating loci respectively **B)** Distribution of RT values for the top 5 percentile of contacts for all baits. Positive values of RT indicate early replication and negative values of RT indicate late replication. For reference, the RT distribution of all HindIII loci for the respective chromosome is shown in grey.



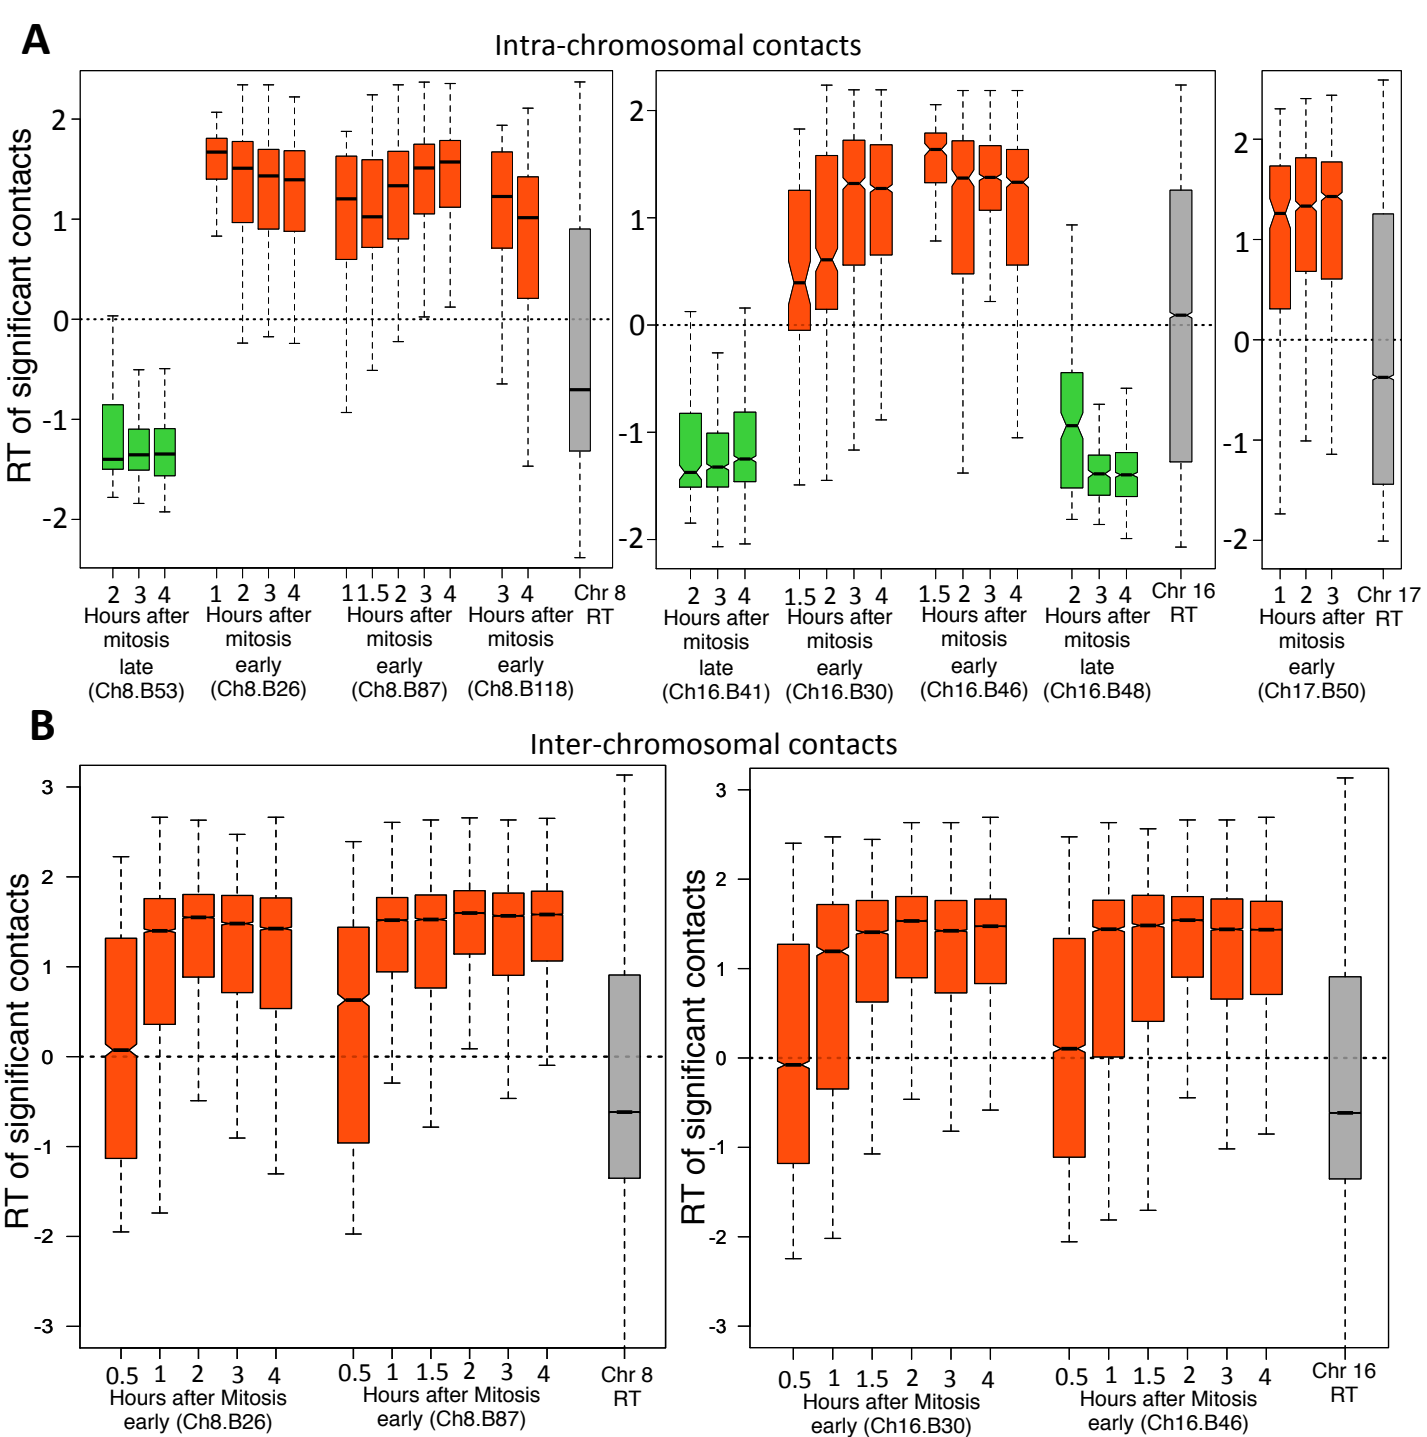

**Supplementary Figure 7: Replication timing of significant contacts. A)**

Replication timing of the FDR corrected significant intra-chromosomal contacts (FDR 0.1) for bait/time-points with at least 100 significant contacts. There were less than 100 significant post-TDP contacts for Ch8.B7, Ch8.B44 and Ch17.B76

**B)** Replication timing of the FDR corrected significant inter-chromosomal contacts (FDR 0.1). Significance calculation is described in the methods section. Baits that had low number of post-TDP significant contacts (<10000 genome wide) are not shown.



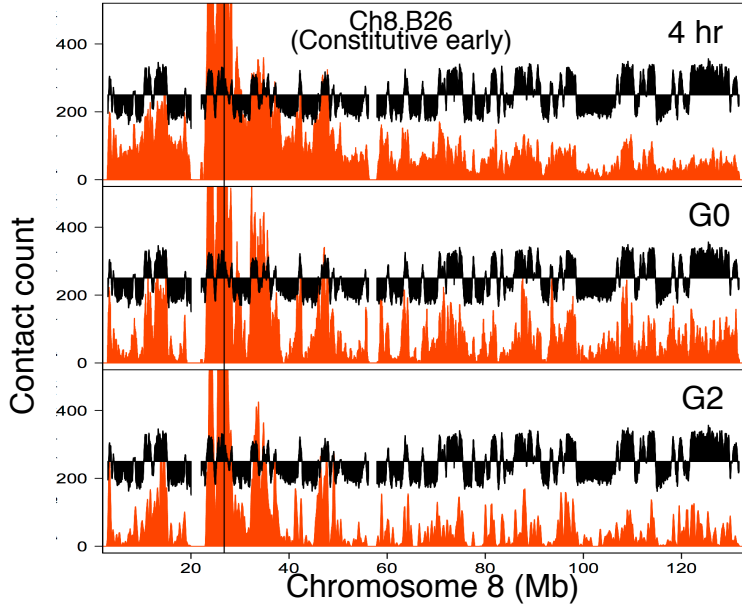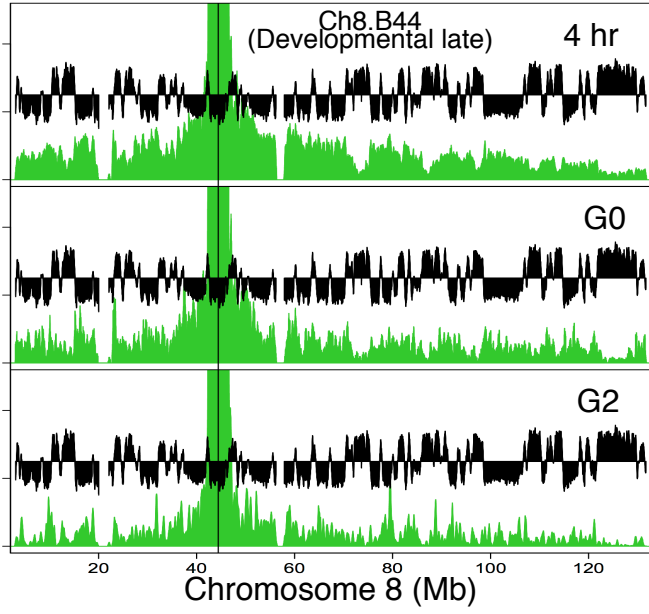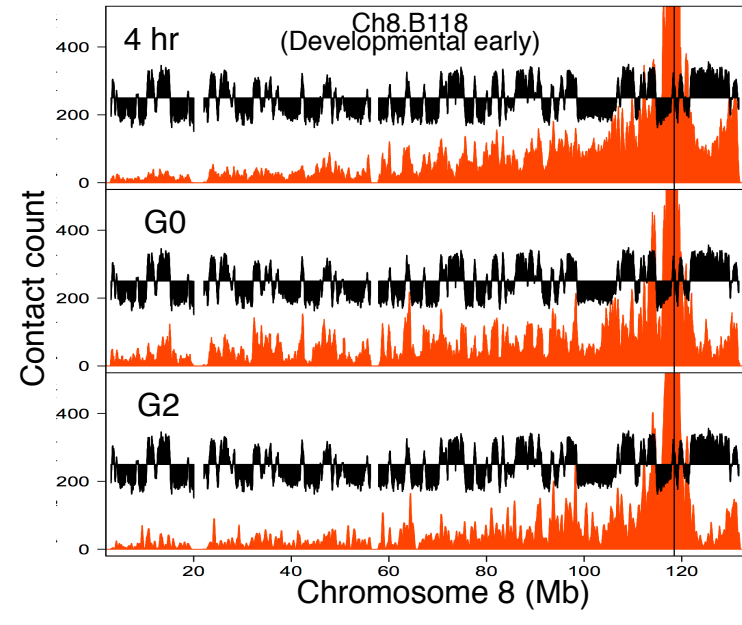

**Supplementary Figure 8:**  
Smoothed contact count for G0 and G2 and G1 (4 hr). Smoothed contact count showing 4hr, G0 and G2 time points for 3 baits on chromosome 8.

**A**

## Datasets available in GM12878 HeLa S3

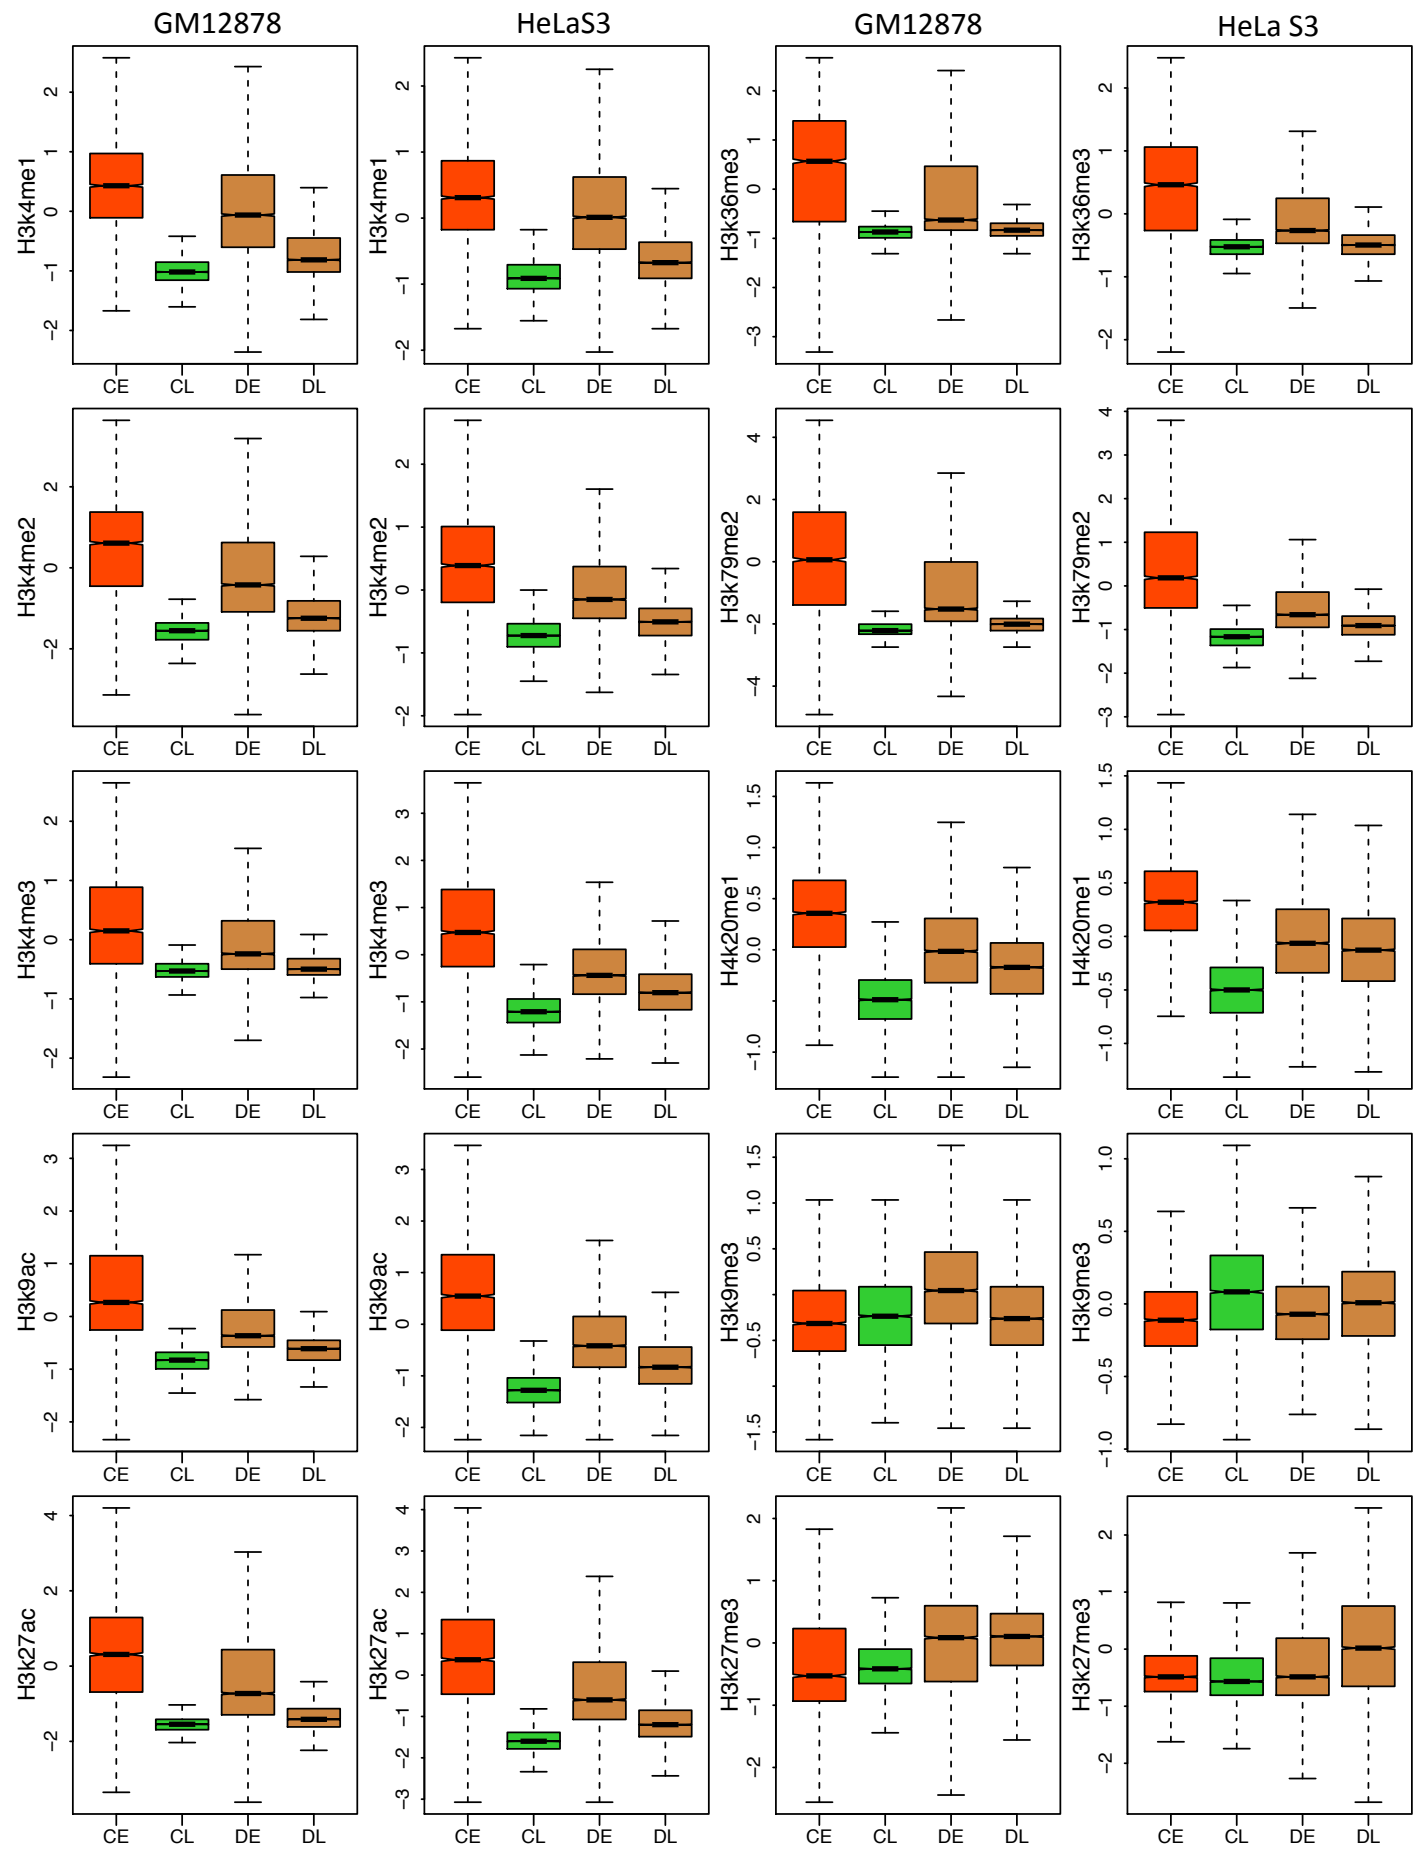

GM12878

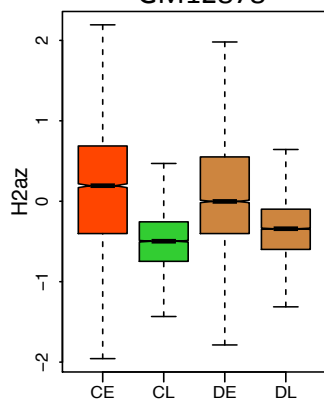

HeLa S3

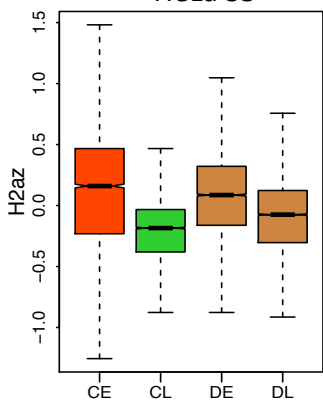

GM12878

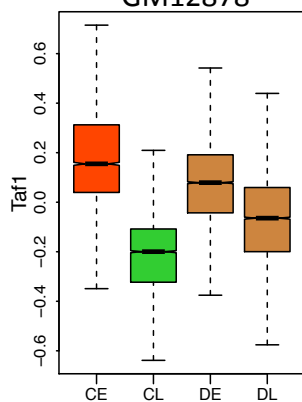

HeLa S3

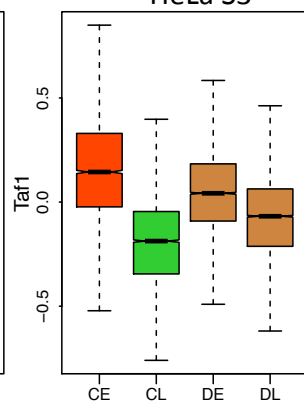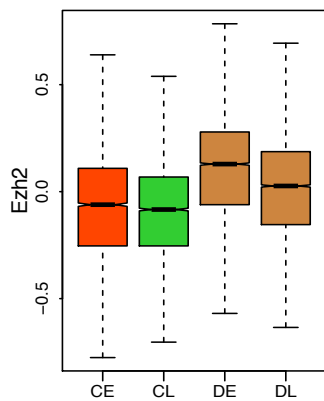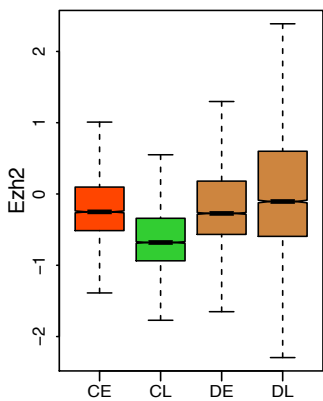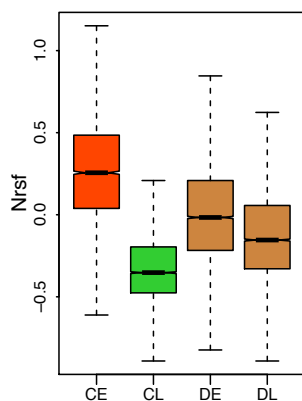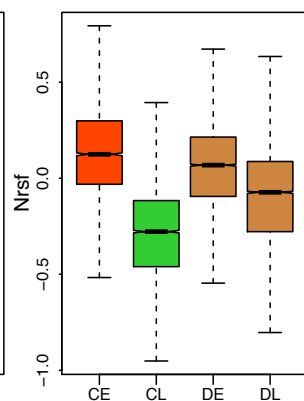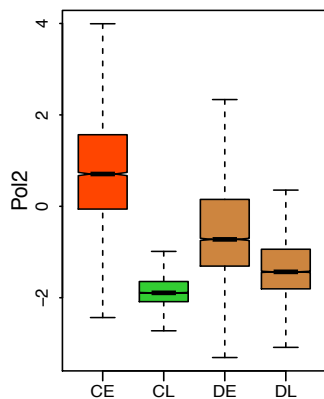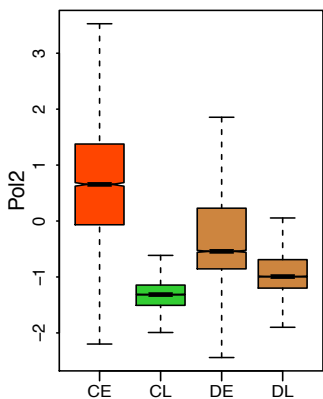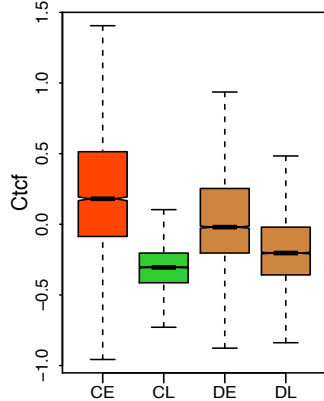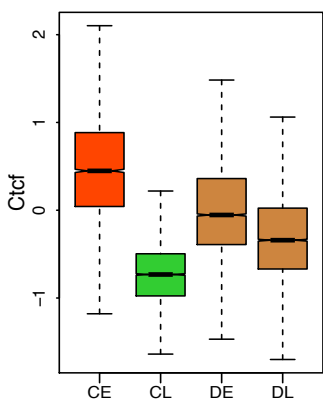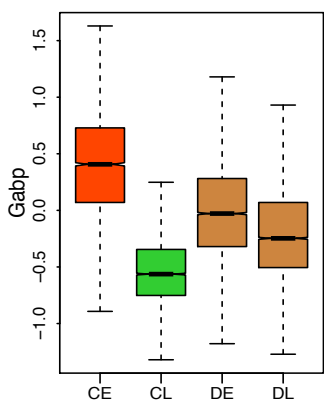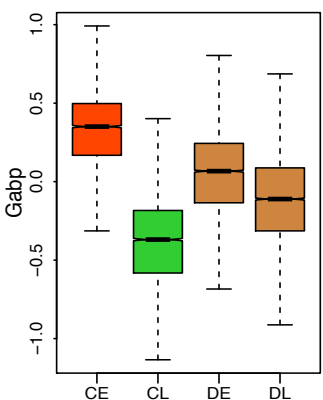

B

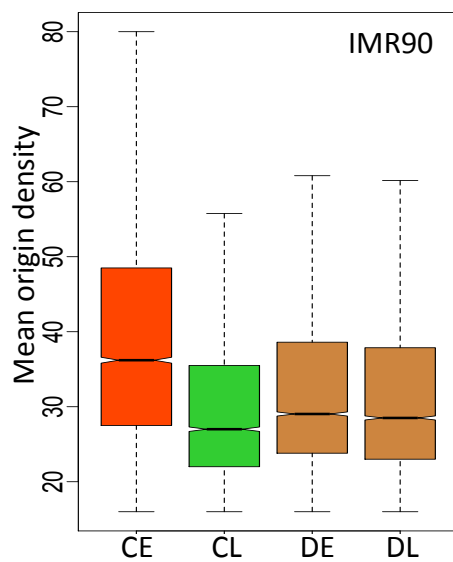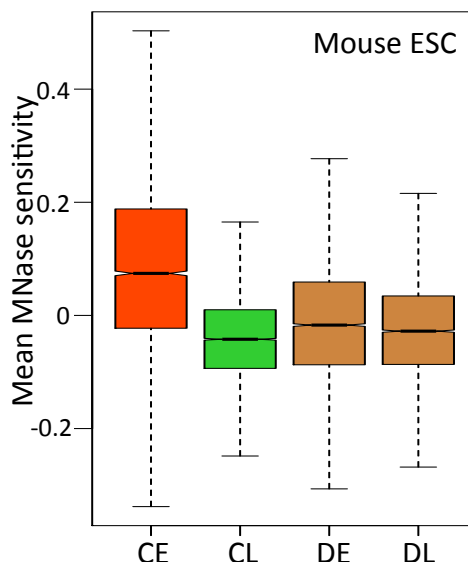

Datasets available only in GM12878

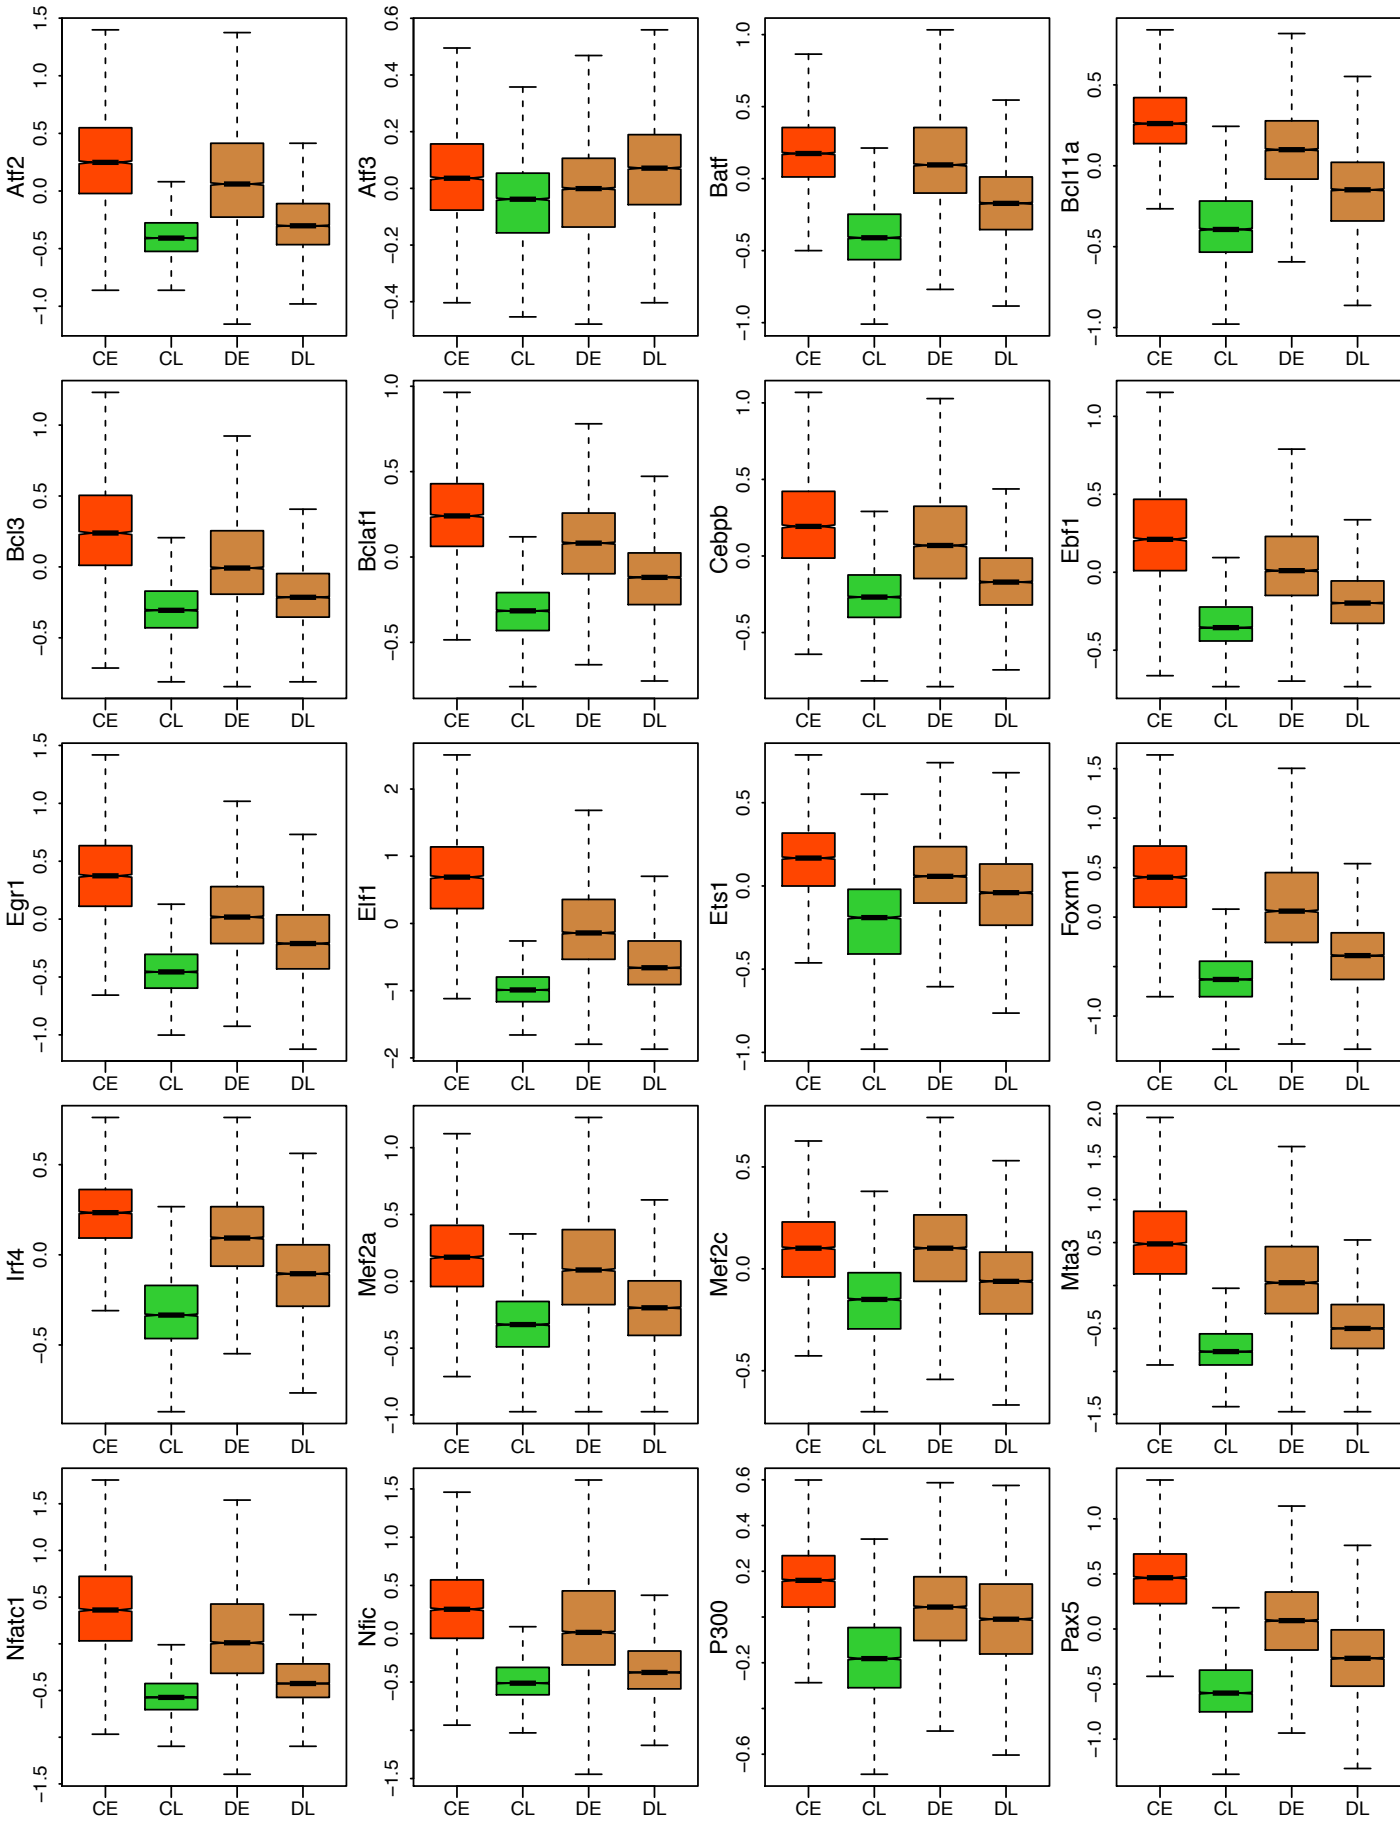

Datasets available only in GM12878

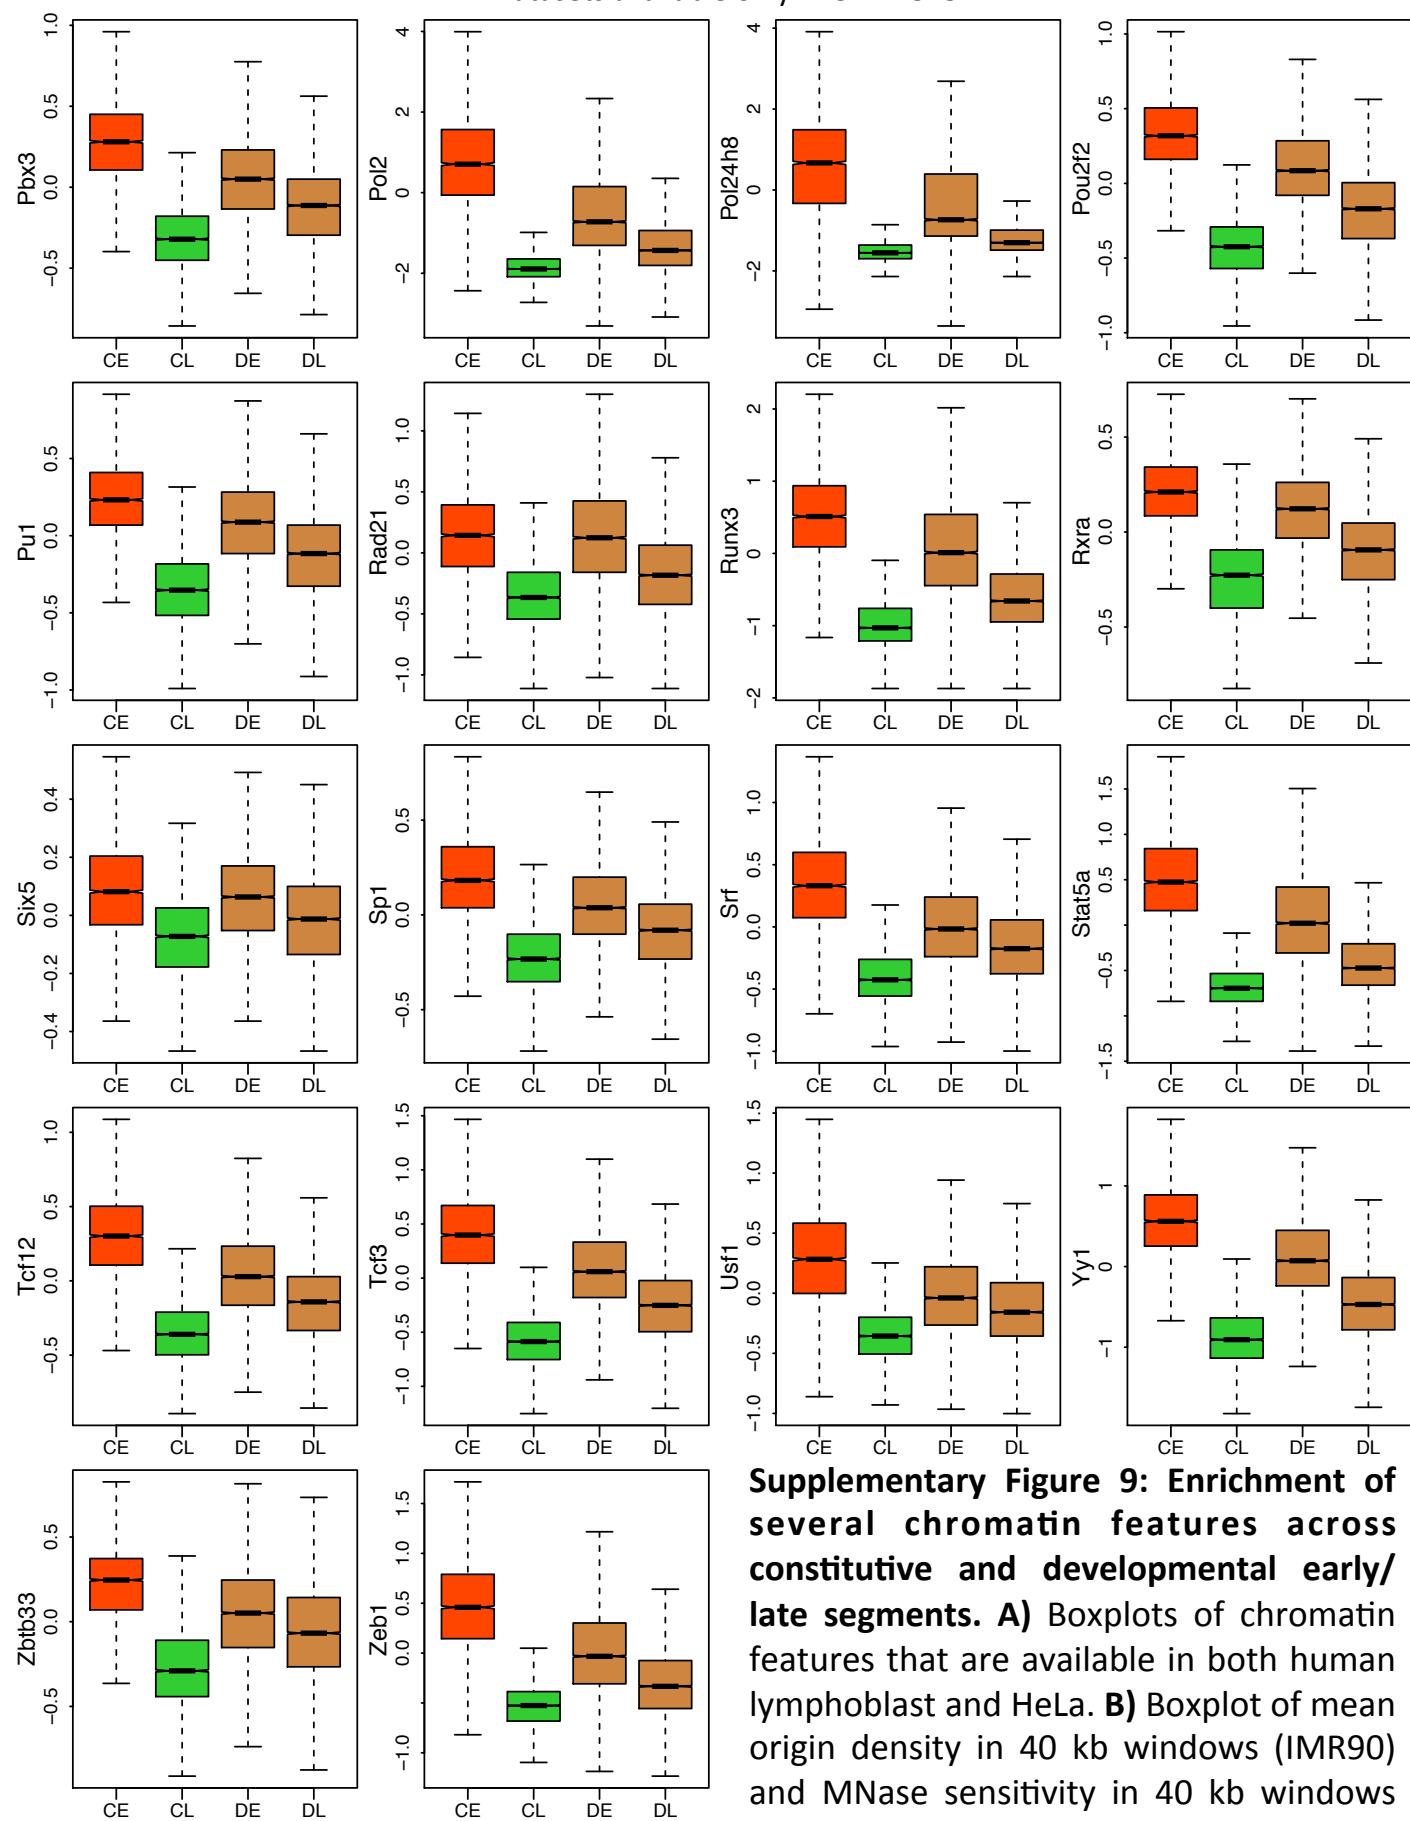

**Supplementary Figure 9: Enrichment of several chromatin features across constitutive and developmental early/late segments. A)** Boxplots of chromatin features that are available in both human lymphoblast and HeLa. **B)** Boxplot of mean origin density in 40 kb windows (IMR90) and MNase sensitivity in 40 kb windows (mouse ESC). **C)** Boxplots of chromatin features that are available only in human lymphoblast.

| Bait Name/ category                                      | CHR   | Position (mm9) | Sequence                                                                                                                                  |
|----------------------------------------------------------|-------|----------------|-------------------------------------------------------------------------------------------------------------------------------------------|
| Ch8.B7<br>Constitutive late replicating                  | Chr8  | 7223950        | F:5'AATGATACGGCGACCACCGAACACTCTTTCCCTACACGAC<br>GCTCTTCCGATCTTATTAGGACAGACAGAAGCTT<br>R:5'CAAGCAGAAGACGGCATAACGAAGAAGAAAGCAATCACTC<br>AC  |
| Ch8.B53<br>Constitutive late replicating                 | Chr8  | 52961959       | F:5'AATGATACGGCGACCACCGAACACTCTTTCCCTACACGAC<br>GCTCTTCCGATCTAAACATGTTTGGCCAAGCTT<br>R:5'CAAGCAGAAGACGGCATAACGATGTCCAGTGAAGATTTGCT<br>CTT |
| Ch8.B26<br>Constitutive early replicating                | Chr8  | 26774313       | F:5'AATGATACGGCGACCACCGAACACTCTTTCCCTACACGAC<br>GCTCTTCCGATCTTTGAGTTTGACGCCAAGCTT<br>R:5'CAAGCAGAAGACGGCATAACGACTTTTCGCCAGAGTAA<br>CG     |
| Ch8.B87<br>Constitutive early replicating                | Chr8  | 87434064       | F:5'AATGATACGGCGACCACCGAACACTCTTTCCCTACACGAC<br>GCTCTTCCGATCTGGGCGGAGATGGAAGCTT<br>R:5'CAAGCAGAAGACGGCATAACGATTGGCAAAGCTCTGGAAG<br>GT     |
| Ch8.B44<br>Developmental (late replicating<br>in C127)   | Chr8  | 44417335       | F:5'AATGATACGGCGACCACCGAACACTCTTTCCCTACACGAC<br>GCTCTTCCGATCTGGTCATCCCTTTAGAAGCTT<br>R:5'CAAGCAGAAGACGGCATAACGATAAGTTCAATTCCCAGCAA<br>C   |
| Ch8.B118<br>Developmental (early<br>replicating in C127) | Chr8  | 118459309      | F:5'AATGATACGGCGACCACCGAACACTCTTTCCCTACACGAC<br>GCTCTTCCGATCTCCTCATAACAGCTGGAAGCTT<br>R:5'CAAGCAGAAGACGGCATAACGAAATGGCTAAACCCCACTCT<br>CT |
| Ch17.B76<br>Constitutive late replicating                | Chr17 | 76305544       | F:5'AATGATACGGCGACCACCGAACACTCTTTCCCTACACGAC<br>GCTCTTCCGATCTGGTCATCCCTTTAGAAGCTT<br>R:5'CAAGCAGAAGACGGCATAACGATAAGTTCAATTCCCAGCAA<br>C   |
| Ch17.B50<br>Developmental (early<br>replicating in C127) | Chr17 | 49968658       | F:5'AATGATACGGCGACCACCGAACACTCTTTCCCTACACGAC<br>GCTCTTCCGATCTCCTCATAACAGCTGGAAGCTT<br>R:5'CAAGCAGAAGACGGCATAACGAAATGGCTAAACCCCACTCT<br>CT |
| Ch16.B30<br>Constitutive early replicating               | Chr16 | 30595243       | F:5'AATGATACGGCGACCACCGAACACTCTTTCCCTACACGAC<br>GCTCTTCCGATCTCGGAAACTCAGCGGTAAAGC<br>R:5'CAAGCAGAAGACGGCATAACGATTAGGCCCTGAATGTTGG<br>TC   |
| Ch16.B41<br>Constitutive late replicating                | Chr16 | 40919975       | F:5'AATGATACGGCGACCACCGAACACTCTTTCCCTACACGAC<br>GCTCTTCCGATCTAAGGCACAGGTAGCCAAGC<br>R:5'CAAGCAGAAGACGGCATAACGAAGGCTCCTATCAGCAAGC<br>AC    |
| Ch16.B46<br>Constitutive early replicating               | Chr16 | 45838128       | F:5'AATGATACGGCGACCACCGAACACTCTTTCCCTACACGAC<br>GCTCTTCCGATCTGCTACCTAACTGGGCAAAGC<br>R:5'CAAGCAGAAGACGGCATAACGATGTCCTGCTTCTGTGTG<br>AG    |
| Ch16.B48<br>Developmental (late replicating<br>in C127)  | Chr16 | 48602104       | F:5'AATGATACGGCGACCACCGAACACTCTTTCCCTACACGAC<br>GCTCTTCCGATCTGGCTGTAGCTTAGGGAAGC<br>R:5'CAAGCAGAAGACGGCATAACGAGGGTCTCATAAGCTGTG<br>GA     |

**Supplementary Table 1:** 4C-seq forward and reverse primers used for Illumina sequencing.



| Sample                            | Mapped reads | Sample                            | Mapped reads | Sample                           | Mapped reads | Sample                            | Mapped reads |
|-----------------------------------|--------------|-----------------------------------|--------------|----------------------------------|--------------|-----------------------------------|--------------|
| Ch17.B76.PM.3hrs.bio.replicate1   | 1525018      | Ch8.B26.G0.bio.replicate2         | 3422887      | Ch8.B26.PM.4hrs.bio.replicate1   | 2179299      | Ch16.B41.PM.3hrs.bio.replicate1   | 283213       |
| Ch17.B76.PM.30mins.bio.replicate1 | 6722592      | Ch8.B44.G0.bio.replicate1         | 3060249      | Ch8.B118.G0.bio.replicate2       | 943564       | Ch17.B50.PM.3hrs.bio.replicate1   | 1506835      |
| Ch8.B118.PM.4hrs.bio.replicate1   | 3444712      | Ch16.B30.PM.30mins.bio.replicate1 | 5556148      | Ch8.B44.PM.3hrs.bio.replicate1   | 1876253      | Ch17.B76.PM.1hr.bio.replicate1    | 1412223      |
| Ch8.B44.PM.2hrs.tech.replicate2   | 2878582      | Ch16.B48.PM.1.5hrs.bio.replicate1 | 3946062      | Ch8.B118.PM.1hr.bio.replicate2   | 719854       | Ch16.B48.PM.1hr.bio.replicate1    | 1381420      |
| Ch8.B44.PM.2hrs.tech.replicate1   | 1361387      | Ch17.B50.PM.2hrs.bio.replicate1   | 3840074      | Ch8.B118.PM.1hr.bio.replicate1   | 266006       | Ch16.B30.PM.2hrs.bio.replicate2   | 1138984      |
| Ch16.B46.PM.2hrs.bio.replicate1   | 5780630      | Ch8.B118.PM.1.5hrs.bio.replicate1 | 3665663      | Ch16.B46.PM.3hrs.bio.replicate1  | 7831923      | Ch8.B44.PM.4hrs.bio.replicate1    | 1061114      |
| Ch16.B46.PM.2hrs.bio.replicate2   | 1218419      | Ch16.B41.PM.4hrs.bio.replicate1   | 2266020      | Ch8.B53.PM.1hr.bio.replicate2    | 4868171      | Ch16.B30.PM.2hrs.bio.replicate1   | 1265421      |
| Ch8.B44.PM.30mins.bio.replicate2  | 3626764      | Ch8.B26.PM.2hrs.tech.replicate2   | 531754       | Ch8.B53.PM.1hr.bio.replicate1    | 7215800      | Ch8.B118.PM.2hrs.tech.replicate1  | 1432325      |
| Ch8.B7.PM.3hrs.bio.replicate1     | 2007587      | Ch8.B26.PM.2hrs.tech.replicate1   | 1255171      | Ch8.B7.G2.bio.replicate1         | 4535650      | Ch8.B118.PM.2hrs.tech.replicate2  | 1460428      |
| Ch8.B44.PM.30mins.bio.replicate1  | 1921831      | Ch16.B46.PM.30mins.bio.replicate1 | 1697496      | Ch8.B87.PM.4hrs.bio.replicate1   | 6219399      | Ch8.B53.PM.1.5hrs.bio.replicate1  | 1310109      |
| Ch16.B30.PM.4hrs.bio.replicate1   | 2615498      | Ch8.B118.PM.30mins.bio.replicate1 | 8826711      | Ch8.B118.G2.bio.replicate1       | 5921514      | Ch16.B41.PM.1hr.bio.replicate1    | 1181384      |
| Ch8.B7.M.0hr.bio.replicate1       | 383908       | Ch8.B118.PM.30mins.bio.replicate2 | 4032833      | Ch8.B7.G0.bio.replicate2         | 6614698      | Ch8.B87.PM.2hrs.tech.replicate2   | 914363       |
| Ch8.B7.PM.2hrs.tech.replicate1    | 1371401      | Ch16.B41.PM.2hrs.bio.replicate1   | 6373010      | Ch8.B26.G0.bio.replicate1        | 5097919      | Ch8.B87.PM.2hrs.tech.replicate1   | 1598251      |
| Ch8.B7.PM.2hrs.tech.replicate2    | 4912157      | Ch16.B48.PM.30mins.bio.replicate1 | 2992780      | Ch17.B50.PM.1hr.bio.replicate1   | 2733464      | Ch8.B53.G2.bio.replicate1         | 2749821      |
| Ch16.B46.PM.1.5hrs.bio.replicate1 | 4627368      | Ch16.B41.PM.2hrs.bio.replicate2   | 6987700      | Ch8.B53.PM.4hrs.bio.replicate2   | 2163015      | Ch16.B30.PM.3hrs.bio.replicate1   | 2515052      |
| Ch8.B53.PM.2hrs.tech.replicate2   | 1370094      | Ch8.B87.PM.1.5hrs.bio.replicate1  | 3470068      | Ch16.B46.PM.1hr.bio.replicate1   | 1073125      | Ch8.B7.PM.4hrs.bio.replicate1     | 2771825      |
| Ch8.B53.M.0hr.bio.replicate1      | 3246749      | Ch8.B53.PM.30mins.bio.replicate2  | 4198215      | Ch8.B118.PM.3hrs.bio.replicate1  | 244438       | Ch8.B44.PM.1hr.bio.replicate2     | 3183404      |
| Ch8.B53.PM.2hrs.tech.replicate1   | 5293681      | Ch8.B53.PM.30mins.bio.replicate1  | 6110678      | Ch16.B46.PM.4hrs.bio.replicate1  | 278667       | Ch8.B44.PM.1hr.bio.replicate1     | 2813671      |
| Ch16.B48.PM.2hrs.bio.replicate2   | 1260841      | Ch8.B7.PM.1hr.bio.replicate1      | 2425567      | Ch8.B7.PM.30mins.bio.replicate1  | 186019       | Ch8.B44.G0.bio.replicate2         | 2027030      |
| Ch16.B48.PM.2hrs.bio.replicate1   | 2691084      | Ch8.B87.PM.1hr.bio.replicate1     | 803137       | Ch8.B7.PM.30mins.bio.replicate2  | 182669       | Ch16.B30.PM.1.5hrs.bio.replicate1 | 3281061      |
| Ch8.B26.G2.bio.replicate1         | 678688       | Ch8.B87.PM.1hr.bio.replicate2     | 468921       | Ch8.B53.G0.bio.replicate2        | 203016       | Ch8.B87.PM.3hrs.bio.replicate1    | 3301246      |
| Ch8.B53.PM.3hrs.bio.replicate1    | 2502399      | Ch8.B7.PM.1hr.bio.replicate2      | 3770333      | Ch8.B87.PM.30mins.bio.replicate2 | 289399       | Ch16.B30.PM.1hr.bio.replicate1    | 2820728      |
| Ch8.B118.G0.bio.replicate1        | 2385700      | Ch17.B76.PM.2hrs.bio.replicate1   | 3644303      | Ch8.B87.G0.bio.replicate1        | 223239       | Ch16.B41.PM.1.5hrs.bio.replicate1 | 3081112      |
| Ch8.B26.PM.3hrs.bio.replicate1    | 809466       | Ch8.B26.PM.30mins.bio.replicate2  | 1448846      | Ch8.B87.PM.30mins.bio.replicate1 | 273020       | Ch16.B48.PM.4hrs.bio.replicate1   | 2898355      |
| Ch16.B41.PM.30mins.bio.replicate1 | 1540182      | Ch8.B26.PM.30mins.bio.replicate1  | 3860921      | Ch8.B26.M.0hr.bio.replicate1     | 268806       | Ch8.B53.G0.bio.replicate1         | 2765889      |
| Ch8.B87.G2.bio.replicate1         | 7268391      | Ch8.B44.G2.bio.replicate1         | 2977454      | Ch8.B87.G0.bio.replicate2        | 191295       | Ch8.B26.PM.1hr.bio.replicate2     | 2241038      |
| Ch16.B48.PM.3hrs.bio.replicate1   | 3752253      | Ch17.B50.PM.30mins.bio.replicate1 | 1420425      | Ch8.B7.G0.bio.replicate1         | 185000       | Ch8.B26.PM.1hr.bio.replicate1     | 2637584      |
|                                   |              |                                   |              |                                  |              | Ch8.B44.M.0hr.bio.replicate1      | 3024047      |
|                                   |              |                                   |              |                                  |              | Sum                               | 291093963    |

**Supplementary Table 2: Number of mapped reads for all bait and time point combinations.**

| <b>Dataset</b>                                                               | <b>Figure</b>               | <b>Reference</b>                                                                                                                                                                                                                                                                                                    | <b>GEO<br/>Accession</b> |
|------------------------------------------------------------------------------|-----------------------------|---------------------------------------------------------------------------------------------------------------------------------------------------------------------------------------------------------------------------------------------------------------------------------------------------------------------|--------------------------|
| Hi-C data                                                                    | Fig 5B, 5C, 5D              | Rao SSP, Huntley MH, Durand NC, Stamenova EK, Bochkov ID, Robinson JT, Sanborn AL, Machol I, Omer AD, Lander ES, et al. 2014. A 3D Map of the Human Genome at Kilobase Resolution Reveals Principles of Chromatin Looping. <i>Cell</i> <b>159</b> : 1665–1680.                                                      | GSE63525                 |
| Human fibroblast (Tig3) LaminB damID                                         | Fig 6A, 6B                  | Guelen, L., Pagie, L., Brasset, E., Meuleman, W., Faza, M., Talhout, W., ... van Steensel, B. (2008). Domain organization of human chromosomes revealed by mapping of nuclear lamina interactions. <i>Nature</i> , 453(7197), 948–951                                                                               | GSE8854                  |
| Mouse astrocyte LaminB damID                                                 | Fig 6A, 6B                  | Peric-Hupkes, D., Meuleman, W., Pagie, L., Bruggeman, S., Solovei, I., Brugman, W., ... van Steensel, B. (2010). Molecular maps of the reorganization of genome-nuclear lamina interactions during differentiation. <i>Molecular Cell</i> , 38(4), 603–613.                                                         | GSE36132                 |
| IMR90 origin mapping                                                         | Fig 6A, Supplementary Fig 9 | Besnard, E., Babled, A., Lapasset, L., Milhavet, O., Parrinello, H., Dantec, C., ... Lemaitre, J.-M. (2012). Unraveling cell type-specific and reprogrammable human replication origin signatures associated with G-quadruplex consensus motifs. <i>Nature Structural &amp; Molecular Biology</i> , 19(8), 837–844. | GSE37757                 |
| Segway/ChromHMM segmentation labels for HeLa and Human Lymphoblast (GM12878) | Fig 6D                      | Hoffman, M. M., Ernst, J., Wilder, S. P., Kundaje, A., Harris, R. S., Libbrecht, M., ... Noble, W. S. (2013). Integrative annotation of chromatin elements from ENCODE data. <i>Nucleic Acids Research</i> , 41(2), 827–41.                                                                                         |                          |
| ChIP-seq                                                                     | Fig 6A, Supplementary Fig 9 | ENCODE                                                                                                                                                                                                                                                                                                              |                          |
| Replication timing data, MNase sensitivity                                   | Fig 6A, Supplementary Fig 9 | <a href="http://www.replicationdomain.org">www.replicationdomain.org</a>                                                                                                                                                                                                                                            |                          |

**Supplementary Table 3:** Public datasets analyzed for genome-wide analyses.

| <b>Trans-acting Factor</b>                                                                                                                                                                                                                                              | <b>Constitutive early</b> | <b>Constitutive late</b> | <b>Developmental early</b> | <b>Developmental late</b> | <b>No:</b> |
|-------------------------------------------------------------------------------------------------------------------------------------------------------------------------------------------------------------------------------------------------------------------------|---------------------------|--------------------------|----------------------------|---------------------------|------------|
| Atf2, Batf, Bcl11a, Bcl3, Bclaf-1, Cebpb, Ctcf, Ebf1, Egr1, Elf1, Ets1, Foxm1, Gabp, Irf4, Mef2a, Mef2c, Mta3, Nfatc1, Nfic, Nrnf, P300, Pax5, Pbx3, Pol2, Pol24h8, Pou2f2, Pu1, Rad21, Runx3, Rxra, Six5, Sp1, Srf, Stat5a, Taf1, Tcf12, Tcf3, Usf1, Yy1, Zbtb33, Zeb1 | Enriched                  | Depleted                 | Moderately Enriched        | Moderately Depleted       | 42         |
| Atf3, Ezh2                                                                                                                                                                                                                                                              | No significant enrichment |                          |                            |                           | 2          |

| <b>Chromatin marks</b>                            | <b>Constitutive early</b>            | <b>Constitutive late</b> | <b>Developmental early</b> | <b>Developmental late</b> | <b>No:</b> |
|---------------------------------------------------|--------------------------------------|--------------------------|----------------------------|---------------------------|------------|
| H2az, H3k27ac, H3k4me1, H3k4me2, H3k9ac, H4k20me1 | Enriched                             | Depleted                 | Moderately Enriched        | Moderately Depleted       | 6          |
| H3k36me3                                          | Enriched                             | Depleted                 | Moderately Enriched        | Depleted                  | 1          |
| H3k27me3, H3k9me3                                 | No significant enrichment            |                          |                            |                           | 2          |
| H3k4me3, H3k79me2                                 | Different between Gm12878 and HeLaS3 |                          |                            |                           | 2          |

**Supplementary Table 4:** Enrichment of trans-acting factors and histone marks shown in Supplementary Figure 8 across constitutive early/late and developmental early/late segments of the genome.
